1 **Title.** Selection for seed size has indirectly shaped specialized metabolite abundance in oat  
2 (*Avena sativa* L.)

3

4 **Authors and affiliations.**

5 Lauren J. Brzozowski<sup>1\*</sup>, Haixiao Hu<sup>1</sup>, Malachy T. Campbell<sup>1</sup>, Corey D. Broeckling<sup>2</sup>, Melanie  
6 Caffè-Treml<sup>3</sup>, Lucía Gutiérrez<sup>4</sup>, Kevin P. Smith<sup>5</sup>, Mark E. Sorrells<sup>1</sup>, Michael A. Gore<sup>1</sup>, and Jean-  
7 Luc Jannink<sup>1,6</sup>

8

9 <sup>1</sup>Plant Breeding and Genetics Section, School of Integrative Plant Science, Cornell University,  
10 Ithaca, NY 14853, USA

11 <sup>2</sup>Bioanalysis and Omics Center of the Analytical Resources Core, Colorado State University,  
12 Fort Collins, CO, 80523 USA

13 <sup>3</sup>Seed Technology Lab 113 Agronomy, Horticulture & Plant Science Box 2108 Brookings, SD  
14 57007, USA

15 <sup>4</sup>Department of Agronomy University of Wisconsin-Madison Madison, WI 53706, USA

16 <sup>5</sup>Department of Agronomy & Plant Genetics University of Minnesota St. Paul, MN 55108, USA

17 <sup>6</sup>USDA-ARS, Robert W. Holley Center for Agriculture and Health, Ithaca, NY 14853 USA

18 \*Correspondence: Lauren J. Brzozowski ([ljb279@cornell.edu](mailto:ljb279@cornell.edu))

19

20 **Summary.**

21 Plant breeding strategies to optimize metabolite profiles are necessary to develop health-  
22 promoting food crops. In oats (*Avena sativa* L.), seed metabolites are of interest for their  
23 antioxidant properties and their agronomic role in mitigating disease severity, yet have not been  
24 a direct target of selection in breeding. In a diverse oat germplasm panel spanning a century of  
25 breeding, we investigated the degree of variation of these specialized metabolites and how it has  
26 been molded by selection for other traits, like yield components. We also ask if these patterns of  
27 variation persist in modern breeding pools. Integrating genomic, transcriptomic, metabolomic  
28 and phenotypic analyses for three types of seed specialized metabolites – avenanthramides,  
29 avenacins, and avenacosides – we found reduced genetic variation in modern germplasm  
30 compared to diverse germplasm, in part due to increased seed size associated with more  
31 intensive breeding. Specifically, we found that abundance of avenanthramides increases with  
32 seed size, but additional variation is attributable to expression of biosynthetic enzymes, but  
33 avenacoside abundance decreases with seed size and plant breeding intensity. Overall, we show  
34 that increased seed size associated with plant breeding has uneven effects on the seed  
35 metabolome, and broadly contributes to understanding how selection shapes plant specialized  
36 metabolism.

37

38 **Keywords.**

39 *Avena sativa*, specialized metabolism, transcriptomics, eQTL, avenanthramide, avenacin,  
40 avenacoside, seed size, plant breeding

41

## 42 **Introduction.**

43           Plants produce diverse arrays of specialized metabolites, generating a classification of  
44 hundreds of thousands of metabolites (Sorokina *et al.*, 2021), that are nonessential for plant  
45 survival and frequently only found in specific plant lineages (Mutwil, 2020). Plant specialized  
46 metabolites are of interest for their role in biotic and abiotic stress tolerance as well as their  
47 implications for human health as nutraceutical compounds (Afendi *et al.*, 2012; Jacobowitz &  
48 Weng, 2020). Plant breeding efforts to enhance specialized metabolite abundance in crop plants,  
49 however, are constrained by resource-intensive metabolomic phenotyping, genotype by  
50 environment interactions, and limited understanding of the genetic drivers of phenotypic  
51 variation in cultivated germplasm (Soltis & Kliebenstein, 2015). While advances in the study of  
52 model organisms like *Arabidopsis* have contributed to our understanding of specialized  
53 metabolism (Wager & Li, 2018), large scale studies on metabolomic diversity in cultivated  
54 germplasm – like glycoalkaloids in tomato (*Solanum lycopersicum* L.) (Zhu *et al.*, 2018) and  
55 benzoxazinoids in maize (*Zea mays* L.) (Zhou *et al.*, 2019) – provide information about  
56 specialized metabolism limited to specific lineages and in contexts more directly applicable for  
57 plant breeding programs. Overall, characterization of genomic variation and strategies to  
58 translate this information into widely applicable plant breeding strategies are critical steps to  
59 making specialized metabolite composition an accessible goal for plant breeding.

60           Studying specialized metabolites in cultivated plants in addition to wild progenitors or  
61 model organisms is important as specialized metabolite profiles may have also shifted in  
62 response to direct selection or indirect selection for other traits, or through genetic drift. While  
63 there is a longstanding prediction that cultivated plants would have reduced specialized  
64 metabolite concentration as compared to wild plants (as cultivated plants are more susceptible to  
65 biotic stress), there is not a consistent relationship between cultivation status and specialized  
66 metabolites across multiple species (Whitehead *et al.*, 2017). Instead, differences in specialized  
67 metabolite abundance are frequently observed in distinct breeding pools and pedigrees. For  
68 instance, divergence in volatiles of roots has been noted in maize (Rasmann *et al.*, 2005), and  
69 leaves in cranberry (Rodriguez-Saona *et al.*, 2011) and there is variation in leaf glucosinolates in  
70 cultivated Brassicas (Poelman *et al.*, 2008). For plant breeders, insight into how selection  
71 processes affected specialized metabolites can provide a basis for ongoing work and germplasm  
72 selection for breeding efforts.

73 We explored existing variation of specialized metabolites in oats (*Avena sativa* L.) and  
74 how the metabolomic profile has been shaped by plant breeding. Oats were domesticated from  
75 weedy progenitors (Loskutov, 2008) and, like other cereal crops, domesticated oats have  
76 increased seed size compared to wild species (Preece *et al.*, 2017). Oats are used as livestock  
77 feed and have been an important part of human diet in some parts of Europe since before the  
78 Renaissance (Murphy & Hoffman, 1992). The nutraceutical benefits of fiber, skin soothing and  
79 general health promotion of oats were also noted in the first century CE by Dioscorides (Murphy  
80 & Hoffman, 1992). Today, oats are still known as a healthy whole grain (Singh *et al.*, 2013;  
81 Stewart & McDougall, 2014), with high concentrations of unsaturated fats (Carlson *et al.*, 2019)  
82 and heart health-promoting  $\beta$ -glucans (Newell *et al.*, 2012). Both have been the subject of plant  
83 breeding efforts, but yield and disease resistance are still predominant traits of interest for plant  
84 breeding (Haikka *et al.*, 2020; González-Barrios *et al.*, 2021). In addition to these health-  
85 promoting compounds, oat seeds contain multiple specialized metabolites (Sang & Chu, 2017)  
86 but, to the best of our knowledge, these metabolites have not been a direct target of selection.  
87 With this history, we predict that oat specialized metabolites may have been subject to genetic  
88 drift or indirect selection processes (e.g., for seed traits or disease resistance) leading to changes  
89 in patterns of variation. Characterizing the genetic bases of variation will provide a starting point  
90 for plant breeding.

91 We focused on three types of specialized metabolites in oat seed: avenanthramides, and  
92 the saponins avenacins and avenacosides. Avenanthramides are in highest concentration in the  
93 outer layers of the seed, most notably the aleurone layer (Liu & Wise, 2021), while the saponin  
94 avenacosides are concentrated in the endosperm (Önning *et al.*, 1993). Avenanthramides have  
95 antioxidant properties (Meydani, 2009; Sang & Chu, 2017) that are retained through processing  
96 of oats into many consumer products (Pridal *et al.*, 2018). The committed enzymes of  
97 avenanthramide biosynthesis have been characterized, and it is well-established that  
98 avenanthramides are the result of condensation between phenolic acids and anthranilic acid,  
99 products of different branches of aromatic amino acid biosynthesis (Collins, 2011; Wise, 2014;  
100 Li *et al.*, 2019). Avenanthramides are associated with resistance to crown rust (pathogen  
101 *Puccinia coronata* f. sp. *avenae*), (Wise *et al.*, 2008; Wise, 2014), and demonstrate variation in  
102 response to the environment (Emmons & Peterson, 2001; Peterson *et al.*, 2005; Michels *et al.*,  
103 2020). The avenacins and avenacosides are both saponins that have been implicated in reducing

104 plant fungal infections and in lowering cholesterol when consumed, but have received less  
105 attention for research and breeding (Sang & Chu, 2017). Core biosynthetic genes for avenacin  
106 biosynthesis have been identified in roots of the non-cultivated species, *Avena strigosa* (Kemen  
107 *et al.*, 2014; Leveau *et al.*, 2019), but whether variation in expression of these genes affects  
108 abundance in seed tissues of cultivated oat remains unknown.

109 Knowledge of biochemical pathways is a crucial foundation but, for plant breeding, it is  
110 important to further investigate whether variants that affect enzyme activity, or regulation, or  
111 pathway flux, or metabolite transport contribute to the observed phenotypic variation (Soltis &  
112 Kliebenstein, 2015). While loss of function mutations in biosynthetic enzymes are observed and  
113 employed by breeders for specialized metabolites in some crops (e.g., *Pun1* mutation prevents  
114 capsaicin production in pepper (Stewart *et al.*, 2005)), mutations in regulatory elements are  
115 critical in others (e.g., transcription factor *Bt* mediates cucurbitacin accumulation in cucumber  
116 (Shang *et al.*, 2014)). For oats, there is experimental evidence that avenanthramides increase in  
117 response to activation of systemic acquired resistance (salicylic acid mediated defense) (Wise,  
118 2011, 2017; Wise *et al.*, 2016), and degree of induction varies between oat genotypes (Wise *et*  
119 *al.*, 2016), suggesting that regulatory variants could be an important target for selection. While  
120 expression of key biosynthetic enzymes has been profiled (Dimberg & Peterson, 2009; Wise,  
121 2017), there has not been a genome-wide or transcriptome-wide association study to identify  
122 novel genes. We are not aware of comparable studies of saponins. In other crops, integrated  
123 genomic, transcriptomic and metabolomic analyses have been critical in understanding metabolic  
124 profiles. For instance, concomitant changes in fruit metabolome and fruit size have been  
125 characterized in tomatoes (Zhu *et al.*, 2018).

126 We sought to integrate oat seed metabolomic, transcriptomic and genomic data to  
127 characterize genetic variation contributing to specialized metabolite abundance in oat seed. We  
128 also measured oat seed size to evaluate if selection on that yield component has affected  
129 specialized metabolite profiles. Using a diverse germplasm panel that includes oat varieties  
130 developed beginning in 1920 and an elite germplasm panel, we measured whole seed  
131 metabolome phenotypes and seed size and weight traits. In the diverse germplasm panel, we also  
132 conducted transcriptome sequencing of developing seed. We hypothesized that variation is  
133 greater in the diversity than the elite panel, and examined the relationship between seed traits and  
134 specialized metabolites in both of these panels. We also investigated the relative roles of

135 variation in regulation and known biosynthetic enzyme pathway genes in mediating metabolite  
136 variance. To test these predictions, we conducted a genome-wide and a transcriptome-wide  
137 association study (GWAS, TWAS, respectively) and eQTL analysis for metabolites and seed  
138 traits. Overall, this work provides insight into breeding for oat specialized metabolites and more  
139 broadly adds to our foundation of how the relative contributions of genetic variation in regulation  
140 versus direct biosynthesis shapes phenotypic variation of specialized metabolites in crop plants.

141

142

143

#### 144 **Materials and methods.**

145 *Oat germplasm.* We used two germplasm panels of inbred lines, a diversity panel intended to  
146 capture genetic diversity in cultivated oats and an elite panel consisting of lines selected from the  
147 North American uniform oat performance nursery. These germplasm panels have been  
148 previously described in Campbell *et al.* (2021) and Hu *et al.* (2021). In the diversity panel, there  
149 were 368 entry genotypes (inbred lines) and seven check genotypes planted in an augmented  
150 design at Ithaca, New York, US in 2018. Six genotypes that lacked both genotyping data and  
151 gene expression data were removed from our analysis. The elite panel consisted of inbred lines,  
152 and was evaluated in three northern US environments (Minnesota, “MN”; South Dakota, “SD”;  
153 Wisconsin, “WI”) in 2017 in an augmented design with 232 entries and three checks. Nineteen  
154 entries were included in both the diversity and elite panels, and were removed from the elite  
155 panel analyses to compare independent sets of germplasm.

156

157 *Oat seed secondary metabolite phenotypes.* We profiled the seed metabolome in the oat diversity  
158 panel and elite panel. Detailed descriptions of extraction and processing of these samples has  
159 been previously (Campbell *et al.*, 2021; Hu *et al.*, 2021) and is provided here in **Method S1**.  
160 Briefly, extractions and measurements were conducted at the Bioanalysis and Omics Center of  
161 the Analytical Resources Core (“ARC-BIO”), at Colorado State University (Fort Collins, CO,  
162 USA). Briefly, 50 seeds were dehulled, homogenized and extracted using a biphasic extraction  
163 method to separate polar and non-polar compounds. Chromatography analysis of the polar  
164 compounds (aqueous layer) was done using a Waters Acquity UPLC system with a Waters  
165 Acquity UPLC CSH Phenyl Hexyl column (1.7  $\mu$ M, 1.0 x 100 mm) and a Waters Xevo G2 TOF-

166 MS with an electrospray source in positive mode. Mass features were annotated by first  
167 searching against an in-house spectra and retention time database using RAMSearch (Broeckling  
168 *et al.*, 2016) and then by using MSFinder (Tsugawa *et al.*, 2016). Names and spectra of the  
169 specialized metabolites are given in **Table S1**. The mass spectra of the specialized metabolites  
170 were positively annotated by these methods in the diversity panel, which was analyzed in 2018.  
171 Many of the specialized metabolites were also annotated in the elite panel (measured in 2017),  
172 and missing annotations were completed by comparing spectra to the diversity panel and  
173 published mass spectra for avenanthramides (de Bruijn *et al.*, 2019), avenacins (Leveau *et al.*,  
174 2019) and avenacosides (Bahraminejad *et al.*, 2008). The final phenotype reported was the  
175 relative signal intensity (relative concentration) of each metabolite.

176 Best linear unbiased predictions (BLUPs) were calculated for each metabolite for the  
177 diversity panel, and separately for each environment of the elite panel. To account for skew, data  
178 were log<sub>2</sub> transformed. Then, relative concentration of each metabolite was modeled with a  
179 linear mixed model in R (R Core Team, 2016) with lme4 (Bates *et al.*, 2015). For each  
180 metabolite, there were fixed effects of whether the genotype was a replicated check and days to  
181 heading (“DTH”) as a numeric covariate, and random effects of experimental block, batch in  
182 which the sample was run on the LCMS, and genotype. Outliers were defined as having  
183 studentized residual >3, and were removed, and the model was recalculated. Effect significance  
184 of the DTH covariate is shown in (**Table S2**). The BLUPs were then deregressed (Garrick *et al.*,  
185 2009). The deregressed BLUPs (drBLUPs) were used in all following analyses. Pearson’s  
186 correlations were estimated between phenotypes using the ‘cor.test’ function in R.

187  
188 *Oat seed size and mass phenotypes.* After dehulling, 50 seeds were used for evaluating seed  
189 length, width and height. The seeds were scanned with a two-dimensional scanner, where seed  
190 length and width were extracted with the software WinSeedle (Regent Instrument Canada Inc.,  
191 version 2017). Seed height was measured separately using an electronic caliper manually with  
192 accuracy of 0.01mm. Seed length and width measurements are not available from the elite panel  
193 that was evaluated in South Dakota. Seed volume was estimated as an ellipsoid (Clohessy *et al.*,  
194 2018), and surface area of an ellipsoid was estimated by  $S \approx 4\pi * ((lw)^{1.6} + (lh)^{1.6} + (wh)^{1.6}) / 3)^{1/1.6}$ .  
195 Separately, 100 hand dehulled seeds (hundred kernel weight, “HKW”) and their  
196 respective hulls (“HHW”) were weighed and the percent groat (kernel) was calculated as the

197 percent of total weight (kernel plus hull weight). Deregressed BLUPs were then calculated from  
198 untransformed values in the same manner as the metabolites (above), and used in all further  
199 analysis. The relationship between drBLUPs of seed traits and metabolites was modeled with a  
200 linear model and effect significance was tested by ANOVA.

201  
202 *Oat variety release year.* We conducted an extensive literature search to determine the year of  
203 variety release for as many varieties in the diversity panel as possible. Most varieties were  
204 identified from information on USDA GRIN (<https://npgsweb.ars-grin.gov>), some in Triticeae  
205 Toolbox (<https://triticeaetoolbox.org/POOL>), others in US (<https://apps.ams.usda.gov/>), Canada  
206 (<https://www.inspection.gc.ca/english/plaveg/pbrpov/cropreport/oat>) or Europe  
207 ([https://ec.europa.eu/food/plant/plant\\_propagation\\_material/plant\\_variety\\_catalogues\\_databases/](https://ec.europa.eu/food/plant/plant_propagation_material/plant_variety_catalogues_databases/)  
208 ) plant registrations, and finally as published variety releases. In sum, we identified the year of  
209 variety release for 155 varieties (**Table S3**).

210  
211 *Genotyping and genome-wide association study.* Genotyping-by-sequencing data was retrieved  
212 from T3/Oat (<https://oat.triticeaetoolbox.org/>), filtered to remove markers with more than 60%  
213 missingness and markers with a minor allele frequency of less than 0.02, and then imputed using  
214 the glmnet function (Friedman *et al.*, 2010) in R. Overall, there were 73,527 markers, of which  
215 54,284 could be anchored to the genome (PepsiCO OT3098v1;  
216 [https://wheat.pw.usda.gov/GG3/graingenes\\_downloads/oat-ot3098-pepsico](https://wheat.pw.usda.gov/GG3/graingenes_downloads/oat-ot3098-pepsico)). All 54,284 SNPs  
217 were used for the diversity panel, and 54,219 SNPs were used for the elite panel after these  
218 imputed SNPs were again filtered by minor allele frequency. Kinship matrices were calculated  
219 for the diversity and elite panels with their SNPs using the A.mat function, and genomic  
220 heritability (de los Campos *et al.*, 2015) was calculated using the kin.blup function in rrBLUP  
221 (Endelman, 2011). Genetic correlations were calculated in sommer using the mmer and cov2cor  
222 functions (Covarrubias-Pazaran, 2016). Principal components to use as covariates to account for  
223 population structure were calculated using the prcomp function in R. The first 25 PCs were  
224 calculated, and the scree plot was visually examined to determine the number of PCs to use in  
225 future analyses (**Figure S1**). Five PCs were chosen for the diversity panel and 4 PCs were  
226 chosen for the elite panel. Genome-wide association study (GWAS) was conducted for each  
227 phenotype (drBLUP) in statgenGWAS (Rossum & Kruijer, 2020) using the PCs as covariates



228 and the kinship matrix. For GWAS results,  $P$ -values were adjusted with a bonferroni correction  
229 on a per-trait basis and SNPs with a  $p_{Bonf} < 0.05$  were considered significant. To determine if  
230 any results colocalized with known QTL for crown rust, crown rust QTL were recorded from  
231 recent publications and mapped to the latest genome version (**Table S4**) (Lin *et al.*, 2014;  
232 Babiker *et al.*, 2015; McNish *et al.*, 2020; Zhao *et al.*, 2020).

233  
234 *Transcriptome analyses of oat diversity panel.* Developing oat seed tissue was dissected, and  
235 RNA was extracted using a hot borate protocol at 23 DAA as this time point showed slightly  
236 higher correlation between transcript and relative concentration of metabolites than other  
237 sampled developmental time points (Hu *et al.*, 2020). RNAseq reads were aligned to the oat  
238 transcriptome using Salmon v0.12 (Patro *et al.*, 2017) and transformed using variance stabilizing  
239 transformation in DESeq2 (Love *et al.*, 2014) as described by Hu *et al.*, (2020). For these  
240 analyses, we removed all transcripts expressed in fewer than 50% of samples as these are not  
241 useful for TWAS, leaving 54% of the original set (29,385). We examined the median absolute  
242 deviance of these transcripts to look for outliers and none exceeded a cutoff of  $MAD > 10$ .  
243 Deregressed BLUPs were then calculated in sommer (Covarrubias-Pazaran, 2016) using the  
244 ‘mmer’ function. For each transcript, there were fixed effects of whether the genotype was a  
245 replicated check, the plate in which RNA was extracted from, and days to heading (“DTH”) as a  
246 numeric covariate, and random effects of experimental block and genotype. In all, 22,638  
247 transcripts had converged drBLUPs (non-zero heritability). To remove any additional factors  
248 associated with experimental design, we ran probabilistic estimation of expression residuals  
249 (PEER) and found that  $k=5$  factors (determined by visual examination of scree plot) was  
250 sufficient (**Figure S2**).

251 We then conducted a transcriptome wide association study (TWAS) and enrichment  
252 analyses. We used the transcript PEER residuals and a kinship matrix, as well as five genomic  
253 PCs as covariates for TWAS on the metabolite and seed trait drBLUPs. We implemented TWAS  
254 using the ‘createGData’ and ‘runSingleTraitGwas’ functions in the statgenGWAS package  
255 (Rossum & Kruijer, 2020).  $P$ -values were adjusted per trait using a false discovery rate  
256 adjustment, and transcripts with  $p_{FDR} < 0.05$  were considered significant. The adjusted  $p$ -values  
257 for all transcripts were used in gene ontology (GO) enrichment analysis for each of the  
258 phenotypes for biological processes GO terms. Enrichment analysis was implemented in the R

259 package topGO, where significance was determined based on the default “weight01” algorithm  
260 followed by a Fisher test (Alexa & Rahnenfuhrer, 2016). Finally, transcripts had previously been  
261 assigned to temporally covarying groups (Hu *et al.*, 2020) and these annotations were used to  
262 assign transcripts by date (8, 13, or 18 DAA) and direction (up or down) that expression pattern  
263 shifted. Those that changed on multiple dates were split into the two respective days. We tested  
264 for enrichment of any temporal and direction class using a hypergeometric test with the ‘phyper’  
265 function in R.

266 We also identified transcripts associated with the avenanthramide biosynthetic pathway  
267 (beginning at PAL) and the preceding shikimate pathway using Ensemble Enzyme Prediction  
268 Pipeline (E2P2) annotations (Chae *et al.*, 2014) of transcripts (**Table S5**).

269  
270 *eQTL analysis.* We implemented eQTL analysis in Matrix eQTL (Shabalina, 2012) in R using the  
271 PEER residuals for transcript counts and with five genomic PCs as covariates. SNPs were  
272 defined as significant eQTL at a threshold of  $p_{FDR} < 0.05$  per transcript. As only half of the  
273 transcripts are mapped, we did not differentiate between *cis* and *trans* eQTL, although future  
274 genome and transcriptome assemblies will facilitate this analysis.

275

276

277

## 278 **Results.**

279 *Heritability and correlations of specialized metabolites in oat seed.* Specialized metabolites  
280 (avenanthramides, “AVNs”; avenacins, “AECs”; avenacosides, “AOSs”) were measured in seeds  
281 of a diverse germplasm panel evaluated in one environment and an elite set of oat germplasm  
282 evaluated in three environments. Genomic heritability was low to moderate for most metabolites,  
283 and some metabolites had heritability less than 0.05 (**Figure 1**). In general, there was a strong  
284 degree of phenotypic and genetic correlation within metabolite groups (e.g., within AVNs)  
285 across populations and environments, with the exception of avenacoside B (AOS\_B) (**Figure 1**).  
286 In the diversity panel, the phenolic AVNs tended to have negative phenotypic and genetic  
287 correlations with both saponins (AEC and AOS), while AECs and AOSs were positively  
288 correlated (**Figure 1a**). This trend was less pronounced in the elite population phenotypes in

289 most environments (**Figure 1b-d**). While there was still strong within-group correlation, there  
290 were no significant negative phenotypic correlations between phenolics and saponins.

291  
292 *Relationship between seed traits and specialized metabolites.* We examined seed size traits in  
293 dehulled seeds (volume, surface area and surface area to volume ratio), as well as kernel and hull  
294 weight and percent groat (kernel). In general, heritability of the seed traits was greater than those  
295 of the specialized metabolites (**Table S6**) and seed volume was used for further analyses  
296 (diversity panel  $h^2=0.72$ ; elite panel Minnesota  $h^2=0.50$ ; elite panel Wisconsin  $h^2=0.33$ ). There  
297 were significant relationships between some metabolites and seed size (**Figure 2; Table S7**) and  
298 seed weight and composition (**Table S8**). In both the diversity and elite panel, relative  
299 concentration of AVNs (present in outer seed layers) increased with seed size, despite the  
300 decreased surface area to volume ratio. There was no relationship between avenacins and seed  
301 size except as measured in the elite panel in WI. Finally, relative concentration of AOSs  
302 (concentrated in the inner endosperm) decreased with seed size in the diversity panel but had no  
303 relationship to seed size in the elite panel. This relationship was further confirmed by examining  
304 the genetic correlation between seed traits and the specialized metabolites. In the diversity panel,  
305 there was strong positive genetic correlation between seed volume, seed surface area and  
306 hundred kernel weight and AVNs ( $>0.70$ ), negative correlation with AOSs ( $< -0.23$ ) and  
307 essentially no correlation with AECs (between 0 and  $-0.12$ ). This relationship was less consistent  
308 when examined in the elite panel, and there were not consistent patterns between percent groat  
309 and metabolite traits in any panel or location (**Table S9**).

310  
311 *Effect of breeding intensity on metabolites and seed traits.* Using year of variety release as a  
312 proxy for plant breeding intensity (where later years indicate more intensive breeding efforts),  
313 we tested if breeding intensity affected seed size or metabolites in the individuals in the diversity  
314 panel for which these data are available (phenotypes and year information is available for 138 to  
315 146 individuals per trait; **Table S10**). Seed volume increased over time and, correspondingly,  
316 seed surface area increased and the surface area to volume ratio decreased (**Figure 3a-c**).  
317 Hundred kernel weight and hundred hull weight both also increased over time, but groat percent  
318 remained constant (**Figure 3d-f**). Of the specialized metabolites, the relative concentration of  
319 avenacosides decreased over time, but avenanthramides and avenacins were unaffected (**Figure**

320 **3g-i).** Using multiple regression with year and seed volume as predictors for groat percentage  
321 and the specialized metabolites, the regression coefficient for year was not significantly different  
322 from zero for any metabolite (**Table S11**). These results indicate that while seed size was likely a  
323 target of selection as a yield component that had indirect effects on the seed metabolome  
324 composition, factors independent of size and breeding intensity also contributed to the observed  
325 metabolome variation.

326

327 *Genome wide association study.* Single-trait GWAS was conducted for each of the specialized  
328 metabolites and seed traits in the diversity panel and each environment of the elite panel. Few  
329 metabolite traits had SNPs above a significance threshold of  $p_{Bonferroni} < 0.05$  (**Table 1; Figure**  
330 **S3**). No seed size traits had a significant GWAS result, but percent groat did in one environment  
331 of the elite panel (**Table 1; Figure S3**). None of these eleven significant SNPs were within genes  
332 (all genes within +/- 100kb of the SNPs are presented in **Table S12**). The significant GWAS  
333 results for AVN\_A in the diversity panel on Chromosome 3A did not colocalize with known  
334 QTL for resistance to crown rust (McNish *et al.*, 2020) (**Table S2**), despite the previously  
335 reported relationships between AVN concentration and crown rust resistance.

336 To visualize genomic regions relevant for metabolite and seed traits and determine if  
337 there is shared genetic control between traits, populations or environments, we examined all  
338 SNPs that met a reduced significance threshold of  $p_{FDR} < 0.20$  and plotted them in 10Mb bins  
339 (**Figure 4**). Within population and environment (e.g., elite panel in Minnesota), there were no  
340 shared SNPs between any two or more traits (e.g., between AVNs and seed size), indicating that  
341 the metabolite and seed traits do not have common large effect loci. Within AVNs, only results  
342 from the diversity panel met this threshold (**Figure 4a**). There were multiple points of overlap  
343 between environments and panels for AECs, with the highest count of shared SNPs on 5A (elite-  
344 MN, diversity panel) and 5C (elite-MN, elite-WI, diversity panel) (**Figure 4b**), and there were  
345 consistent SNPs identified for AOSs between the elite panel evaluated in MN and SD on  
346 chromosomes 1C and 4A (**Figure 4c**). However, the regions identified for seed size traits in the  
347 elite panel and the diversity panel were not shared (**Figure 4d**). As different genomic regions  
348 were implicated between panels and environments for the same trait, these results indicate  
349 genetic heterogeneity between panels and genotype-by-environment interactions.

350

351 *Transcriptome analyses.* A transcriptome-wide association analysis (TWAS) was conducted for  
352 each of the specialized metabolites in the diversity panel to assess the relationship between gene  
353 expression and metabolite relative concentration. Of these, both AVNs had significant ( $p_{FDR} <$   
354 0.05) TWAS results (72 for each AVN\_A and AVN\_B), with 51 shared and expression of most  
355 of these shared transcripts (50) positively correlated with increased AVNs (**Table 2, Table S13**).  
356 Of these, phenylalanine ammonia-lyase (“PAL”, TRINITY\_DN26560\_c0\_g2\_i1), the first  
357 committed enzyme of phenylpropanoid biosynthesis and phosphoenolpyruvate/phosphate  
358 translocator 1 (TRINITY\_DN1581\_c0\_g1\_i3), an enzyme in the pentose-phosphate pathway, a  
359 pathway that precedes the shikimate pathway could be connected to biosynthesis. The other  
360 specialized metabolites had few significant TWAS results (**Table 3**): the two AECs shared four  
361 significant transcripts and only AOS\_B had a significant result. No significant transcripts were  
362 detected for any seed traits, even at a less stringent cutoff ( $p_{FDR} < 0.25$ ).

363 To better understand the biological relevance of the rest of the transcripts, GO enrichment  
364 analysis was conducted on the false-discovery rate adjusted  $p$ -values. While only AVN\_B had a  
365 significantly enriched term after multiple test correction (pentose-phosphate shunt,  
366 GO:0006098), GO terms related to the shikimate (chorismate biosynthetic process, GO:0009423)  
367 and L-phenylalanine catabolic processes (GO:0006559) were top GO terms for all  
368 avenanthramides (**Table 4**). There was no significant enrichment of GO terms for either the  
369 avenacins (**Table S14**) or avenacosides (**Table S15**).

370 We also examined how expression of the significant TWAS transcripts changed over  
371 seed development for AVNs. Developing oat seed transcripts were categorized into temporally  
372 covarying groups (Hu *et al.*, 2020) and we found that significant transcripts from AVN TWAS  
373 analysis were enriched for transcripts that had a trajectory of increased expression beginning at  
374 eight days after anthesis when compared to all transcripts (hypergeometric test, AVN\_A:  
375  $p=2.39e-13$ , AVN\_B:  $p=2.82e-10$ ). In contrast, there was weak evidence for enrichment of any  
376 transcript class in known avenanthramide biosynthetic enzymes (hypergeometric test, decrease in  
377 expression at 8DAA,  $p= 0.049$ ) or Shikimate pathway enzymes (hypergeometric test, decrease  
378 in expression at 13DAA,  $p= 0.062$ ) (**Figure 5**).

379 Finally, we tested if seed volume corresponded to expression of AVN TWAS results to  
380 determine if there was expression variation independent of seed volume that could be a target of  
381 selection. Seed size was less predictive of TWAS gene expression than the phenotype (AVN\_B)

382 as measured by coefficient of determination (**Table S16**). For instance, PAL and  
383 Phosphoenolpyruvate/Phosphate Translocator 1 were not strongly associated with seed volume  
384 (**Figure 6**). These results indicate that while relative concentration of AVN tracks with seed  
385 volume and gene expression, gene expression is not strongly linked to seed volume, and thus  
386 gene expression is an independent contributor to patterns of variation in AVN abundance.

387

388 *eQTL analysis*. Because we predicted that expression variation is important for oat specialized  
389 metabolites, especially AVNs, we conducted eQTL analysis on genes detected in TWAS and on  
390 known pathway genes and examined if those eQTL colocalized with our GWAS results. Two  
391 avenanthramide TWAS results had eQTL at a  $p_{FDR} < 0.05$  threshold,  
392 TRINITY\_DN1008\_c0\_g2\_i2 a serine hydroxymethyltransferase 4, and  
393 TRINITY\_DN13684\_c0\_g1\_i1 a mitochondrial aconitate hydratase 3. These two genes neither  
394 co-localized with the avenanthramide GWAS result nor were definitively annotated to a single  
395 position in the oat genome. Relaxing the significance threshold to  $p_{FDR} < 0.2$  revealed eQTL of  
396 four additional genes (**Figure S4**), but the eQTLs detected on chromosome 3A were not in LD  
397 with the GWAS result ( $r^2 < 0.02$  for all).

398 Of the pathway genes (**Table S5**), only TRINITY\_DN2726\_c0\_g1\_i2, a bifunctional 3-  
399 dehydroquinate dehydratase/shikimate dehydrogenase, had a significant eQTL ( $p_{FDR} = 0.002$ ;  
400 Chr 3A, position 15737366, avgbs\_cluster\_12707.1.49). We also examined eQTL from pathway  
401 genes at a  $p_{FDR} < 0.2$  threshold and identified eQTL of five additional genes (**Figure S4**). We  
402 found that eQTL of TRINITY\_DN1661\_c0\_g1\_i1, an anthranilate synthase (avenanthramides  
403 are a condensation between phenolic acids and anthranilic acid), was in LD with the  
404 avenanthramide GWAS result on chromosome 3A with the strongest association being the SNP  
405 avgbs\_cluster\_34200.1.64 ( $p_{FDR} = 0.16$ ,  $r^2 = 0.44$ ).

406

407

408

## 409 **Discussion.**

410 Oat (*Avena sativa* L.) is a cereal crop with known health benefits from consuming the grain or  
411 through topical skincare application. These benefits are derived from a diverse suite of  
412 metabolites, including unsaturated fatty acids and  $\beta$ -glucans as well as the specialized

413 avenanthramides, avencins and avenacosides. We characterized the genomic and transcriptomic  
414 bases of specialized metabolite variation in diverse and elite oat germplasm in the context of  
415 seed size and selection over a century of oat breeding. We found that variation is diminished in  
416 elite germplasm, but selection for larger seeds only accounts for part of that reduction. For  
417 avenanthramides in particular, we found in addition to increased abundance in larger seeds, there  
418 was also variation in biosynthetic enzymes upstream of the committed pathway enzymes that  
419 contributed to phenotypic variation. Broadly, this work addresses longstanding questions about  
420 how crop breeding has shaped specialized metabolome profiles, and prospects for continued  
421 plant breeding.

422

423 *Historical dimensions of oat specialized metabolism and change in seed size.*

424 Specialized metabolites serve multiple purposes in plants, with one prominent use being plant  
425 defense against biotic stresses (Mithöfer & Boland, 2012; Kessler & Kalske, 2018; Jacobowitz &  
426 Weng, 2020). The relationship between plant domestication and breeding, resistance to biotic  
427 stress, and specialized metabolites has been widely examined to understand how plant selection  
428 has shaped agro-ecological interactions. Most work has been conducted comparing wild and  
429 domesticated plants, and has found that cultivated plants are more susceptible to biotic stress  
430 than their wild progenitors (Turcotte *et al.*, 2014; Whitehead *et al.*, 2017; Fernandez *et al.*, 2021).  
431 A concomitant decrease in secondary metabolites, however, has not been consistently observed  
432 (Whitehead *et al.*, 2017). Instead, tradeoffs between plant growth and defense (Whitehead &  
433 Poveda, 2019) or plant nutrition (Fernandez *et al.*, 2021) may be important factors. The studies  
434 that interrogate a spectrum of plant breeding intensity from domestication to landraces to modern  
435 varieties have used less than 25 accessions each, and have produced mixed results where some  
436 find a decrease in resistance with breeding intensity (Rosenthal & Dirzo, 1997; Lindig-Cisneros  
437 *et al.*, 2002) but others do not (Ferrero *et al.*, 2020). Intriguingly, Lindig-Cisneros *et al.*, (2002)  
438 associated reduced biotic stress resistance with reduced metabolite diversity, but not absolute  
439 metabolite concentrations. Overall, these findings indicate that there are nuanced crop-specific  
440 patterns in how breeding has shaped specialized metabolites (and plant defense), but there is a  
441 need for work that includes a greater number of plant accessions and a finer-scale gradient of  
442 plant breeding intensity.

443 In our work, we surveyed oats spanning almost a century of plant breeding - beginning  
444 with the rediscovery of Mendel in the early 20th century to genomics-enabled breeding in the  
445 21st century. Yield has consistently been a trait of plant breeding interest, with yield gains  
446 throughout the 20th century (Rodgers *et al.*, 1983) and is still a focus of current breeding  
447 programs (Haikka *et al.*, 2020; González-Barríos *et al.*, 2021). We examined the relationship  
448 between breeding intensity (by year of variety release), seed size, and defensive metabolites in  
449 more than 138 individuals. We found that more intensive breeding led to larger oat seeds, but not  
450 a greater proportion of edible tissue (groat) and, while relative concentrations of specialized  
451 metabolites were tied to seed size, they were not a direct target of plant breeding. We found that  
452 larger seeds had high avenanthramide abundance, despite decreased surface area to volume ratio  
453 inherent to larger seeds, but there was no relationship with breeding intensity. In contrast,  
454 avenacoside abundance decreased with increasing seed size associated with breeding intensity,  
455 despite larger endosperm volume. These results indicate that there are not consistent tradeoffs  
456 between growth (seed size) and defense (avenanthramides, avenacosides). Further, we found that  
457 ongoing plant breeding did not uniformly reduce or increase plant specialized metabolites, but  
458 may have affected size of and concentration of metabolites in specific seed tissues (like the  
459 aleurone layer).

460

#### 461 *Breeding for oat avenanthramides.*

462 Of the oat seed specialized metabolites, avenanthramides have garnered the most research  
463 interest. Avenanthramides are antioxidants (Bratt *et al.*, 2003) and have been implicated in  
464 resistance to the oat crown rust (Wise *et al.*, 2008; Wise, 2014). The avenanthramide  
465 biosynthetic pathway has been defined (Collins, 2011; Wise, 2014; Li *et al.*, 2019), yet this work  
466 has not been translated into tools for oat breeders, like molecular markers. Critically, it remains  
467 unknown whether functional or regulatory mutations in the committed biosynthetic pathway  
468 enzymes (enzymes specific to avenanthramide biosynthesis) or upstream biosynthetic pathway  
469 enzymes (not specific to avenanthramide biosynthesis) are the most significant contributors to  
470 heritable variation in cultivated oat germplasm. Neither our GWAS nor TWAS results implicated  
471 committed pathway genes. Instead, TWAS revealed that biosynthetically upstream enzymes  
472 expressed early in seed development contributed to avenanthramide abundance. In addition, we  
473 found that an eQTL of a biosynthetically upstream enzyme co-localized with our avenanthramide



474 GWAS result. While our interpretation and enrichment analyses were limited by availability of  
475 transcript annotations (which, likely, are more complete for highly conserved, rather than oat-  
476 specific, genes) these results nonetheless suggest that regulation of or flux through the pathway  
477 may be a promising avenue for plant breeding.

478 Dimberg & Peterson (2009) examined the relationship between avenanthramides and  
479 compounds that are precursors or derived from other branches of related biosynthetic pathways.  
480 Their results did not offer a straightforward indication of which biosynthetic step moderates  
481 pathway flux; instead, PAL expression did not depend upon the amount of its substrate  
482 (phenylalanine) nor did PAL expression affect expression of HHT (the terminal enzyme in  
483 avenanthramide biosynthesis). Our results implicate PAL expression as important for  
484 avenanthramide abundance, as well as a phosphoenolpyruvate translocator in the pentose  
485 phosphate pathway, and other transcripts of unknown function. These results add to the widely  
486 recognized importance of PAL expression as a regulator of flux in phenylpropanoid biosynthesis  
487 (Huang *et al.*, 2010; Kim & Hwang, 2014; Barros & Dixon, 2020). In addition, a broader  
488 examination of precursor metabolites, including those in the pentose phosphate pathway may  
489 produce interesting results as diversification of enzymes from primary metabolism is important  
490 for contributing to specialized metabolism diversity (Moghe & Last, 2015; Maeda, 2019).  
491 Overall, our results should prompt future work on avenanthramides to focus on upstream  
492 biosynthetic processes, as most variation affecting avenanthramides appears to be in enzymes  
493 preceding committed biosynthetic steps.

494 Our results also contribute to an understanding of when avenanthramide biosynthesis  
495 occurs in oat seeds. Avenanthramides are detected as early as eight days after anthesis (DAA),  
496 and while Hu *et al.* (2020) found that HHT is expressed at 8 DAA, Peterson & Dimberg, (2008)  
497 did not observe expression until 20 DAA. By sampling gene expression at only 23 DAA, we  
498 likely sampled at a time where it would be possible to detect differences in HHT expression, but  
499 we may have missed peak differential expression of upstream enzymes that contributed pathway  
500 flux. Our avenanthramide TWAS results were enriched for genes that were expressed early in  
501 seed development (8 DAA), and Hu *et al.*, (2020) found that two other pathway enzymes, 4-  
502 coumaroyl-CoA3-hydroxylase (CCoA3H), caffeoyl-CoA3-O-methyltransferase (CCoAOMT)  
503 increase in expression early in development before dropping beginning at 18 DAA. Together,  
504 these results indicate that the precursors of avenanthramides may be biosynthesized early in seed

505 development. Our understanding will improve with further use of oat genomic resources, as well  
506 as transcriptomic analysis paired with metabolomic profiling over seed development.

507 Finally, despite the connection between avenanthramides and the disease, crown rust, no  
508 results from our GWAS or TWAS results colocalized with previously reported crown rust QTL  
509 (McNish *et al.*, 2020). One explanation for this finding is that we did not inoculate oats with  
510 crown rust, nor trigger systemic acquired resistance (SAR). Both crown rust infection and  
511 treating oats with analogs of hormones that activate SAR increase avenanthramide concentration  
512 (Wise *et al.*, 2008, 2016; Wise, 2011, 2017). We predict that, if SAR was activated, there would  
513 be more extreme variation in avenanthramide concentrations and we would implicate more  
514 genetic loci, some of which would colocalize with crown rust QTL due to shared regulation.  
515 Overall, these results suggest that genetic variation in regulation exists, but regulatory elements  
516 may need to be activated to effectively map or select upon this variation.

517

518 *Prospects for oat saponins – avenacins and avenacosides.*

519 The saponins of oats are of interest from a human health perspective as they are associated with  
520 reduction of cholesterol (Sang & Chu, 2017). Our results did not implicate promising candidate  
521 genes by GWAS nor TWAS that could be applied to develop tools for plant breeders. Like  
522 avenanthramides, our TWAS results are limited by only sampling at one time point. We also  
523 found that the saponins, especially the avenacosides, were more sporadically detected in the elite  
524 germplasm and within compound class correlations were weaker, potentially indicating a  
525 decrease in abundance in moving from diverse to elite germplasm. This may be due to taste: high  
526 concentrations of avenacosides in oat seed can contribute to an undesirable bitter off taste  
527 (Günther-Jordanland *et al.*, 2016, 2020). Selection for organoleptic quality has been implicated  
528 in reducing saponin concentration in cultivated legumes (Ku *et al.*, 2020), and our results  
529 indicate there has been a similar historical trajectory in oat. However, to the best of our  
530 knowledge, current oat breeding efforts do not regularly incorporate sensory evaluations.

531

532 *Selection for an optimized oat seed specialized metabolome.*

533 In breeding for nutrition, flavor, or aesthetics (color), plant breeders have changed crop  
534 metabolomic profiles. However, working with specialized metabolites versus major nutritional  
535 metabolites presents different challenges and thus may require different plant breeding

536 approaches. As an example, fatty acid methyl esters (FAMES) are healthful fats in oat seed that  
537 comprise 3-11% of oat seed composition, compared to 0.2% for avenanthramides. Also, while  
538 fatty acid biosynthetic enzymes have some degree of cross-species conservation, this is not true  
539 for avenanthramides that are only present in a few (non-model) plant species (Ponchet *et al.*,  
540 1988; Wise, 2014) and a caterpillar (Blaakmeer *et al.*, 1994). In addition, the specialized  
541 metabolites we measured in oats are negatively correlated and do not have shared genetic  
542 control, presenting a challenge for selecting for both traits simultaneously but promising for  
543 efforts to select for a single trait. Finally, and perhaps most importantly, the specialized  
544 metabolite heritability (AVNs:  $h^2 < 0.26$ , AECs:  $h^2 < 0.61$ , AOSs:  $h^2 < 0.52$ ) we report here is  
545 lower than that of FAMES ( $h^2 > 0.61$ ) (Carlson *et al.*, 2019). Overall, these results suggest that  
546 work to increase specialized metabolite concentrations will benefit from strategies that reduce  
547 environmental variation to improve trait heritability, or increase replication in plant breeding  
548 trials, and incorporate seed size into phenotyping efforts.

549

#### 550 *Conclusions.*

551 An understanding of patterns of variation in the plant specialized metabolome is relevant for  
552 developing health-promoting functional food crops that may also withstand biotic stress. Due to  
553 the low concentrations and lineage specificity of specialized metabolites, they are infrequent  
554 direct targets of plant breeding, but may have been inadvertently shaped through processes like  
555 selection on other traits or genetic drift. In a diverse panel of cultivated oats, we measured seed  
556 size and specialized metabolites and conducted genomic and transcriptomic analyses to  
557 characterize existing variation and the processes that contributed to it. Overall, we show that the  
558 increased seed size associated with modern plant breeding has uneven effects on the oat seed  
559 metabolome, and variation also exists independently of seed size. Broadly, despite the multitudes  
560 of phenotypic changes in crops from plant breeding, variation for some specialized metabolites  
561 persists in cultivated plants and could be targeted by future plant breeding efforts.

562

563 **Acknowledgements.**

564 Funding for this research was provided by USDA-NIFA-AFRI 2017-67007-26502 and Hatch  
565 Project 149-577.

566 **Author Contributions.**

567 JLJ, MAG and MES designed the research. LJB, HH, and MTC analyzed the data, and HH,  
568 MTC, MCT, LG, KPS and MES conducted experiments. CB conducted the metabolomics  
569 extraction, measurement, and data processing. LJB, MAG and JLJ wrote the manuscript and all  
570 co-authors were involved in editing the manuscript.

571 **Data Availability.**

572 Data files used in these analyses, including all metabolite and seed trait phenotypes for all panels  
573 and locations, gene expression data, gene annotations and genotypes are publicly available in  
574 CyVerse(<https://datacommons.cyverse.org/browse/iplant/home/shared/GoreLab/dataFromPubs/B>  
575 [rzozowski\\_OatMetabolome\\_2021](https://datacommons.cyverse.org/browse/iplant/home/shared/GoreLab/dataFromPubs/B)). Associated raw data has been previously published to public  
576 repositories (Metabolomics: (Haikka *et al.*, 2020) ; gene  
577 expression:[https://datacommons.cyverse.org/browse/iplant/home/shared/commons\\_repo/curated/](https://datacommons.cyverse.org/browse/iplant/home/shared/commons_repo/curated/)  
578 [HaixiaoHu\\_OatMultOmicsPred\\_Jun2021](https://datacommons.cyverse.org/browse/iplant/home/shared/commons_repo/curated/) (DOI: 10.25739/8p1e-0931). Scripts used in this work  
579 are available in github ([https://github.com/ljbrzozowski/OatSeed\\_SpecializedMetabolomics](https://github.com/ljbrzozowski/OatSeed_SpecializedMetabolomics)).  
580

581 **References.**

- 582 **Afendi FM, Okada T, Yamazaki M, Hirai-Morita A, Nakamura Y, Nakamura K, Ikeda S,**  
583 **Takahashi H, Altaf-Ul-Amin M, Darusman LK, et al. 2012.** KNApSACk family databases: Integrated  
584 metabolite-plant species databases for multifaceted plant research. *Plant and Cell Physiology* **53**: 1–12.  
585 **Alexa A, Rahnenfuhrer J. 2016.** *topGO: Enrichment Analysis for Gene Ontology*.  
586 **Babiker EM, Gordon TC, Jackson EW, Chao S, Harrison SA, Carson ML, Obert DE, Bonman JM.**  
587 **2015.** Quantitative Trait Loci from Two Genotypes of Oat (*Avena sativa*) Conditioning Resistance to  
588 *Puccinia coronata*. *Phytopathology* **105**: 239–245.  
589 **Bahraminejad S, Asenstorfer RE, Riley IT, Schultz CJ. 2008.** Analysis of the Antimicrobial Activity  
590 of Flavonoids and Saponins Isolated from the Shoots of Oats (*Avena sativa* L.). *Journal of*  
591 *Phytopathology* **156**: 1–7.  
592 **Barros J, Dixon RA. 2020.** Plant Phenylalanine/Tyrosine Ammonia-lyases. *Trends in Plant Science* **25**:  
593 66–79.  
594 **Bates D, Maechler M, Bolker B, Walker S. 2015.** Fitting Linear Mixed-Effects Models Using lme4.  
595 *Journal of Statistical Software* **67**: 1–48.  
596 **Blaakmeer A, van der Wal D, Stork A, van Beek TA, de Groot A, van Loon JJA. 1994.** Structure-  
597 Activity Relationship of Isolated Avenanthramide Alkaloids and Synthesized Related Compounds as  
598 Oviposition Deterrents for *Pieris brassicae*. *Journal of Natural Products* **57**: 1145–1151.  
599 **Bratt K, Sunnerheim K, Bryngelsson S, Fagerlund A, Engman L, Andersson RE, Dimberg LH.**  
600 **2003.** Avenanthramides in oats (*Avena sativa* L.) and structure-antioxidant activity relationships. *Journal*  
601 *of Agricultural and Food Chemistry* **51**: 594–600.  
602 **Broeckling CD, Ganna A, Layer M, Brown K, Sutton B, Ingelsson E, Peers G, Prenni JE. 2016.**  
603 Enabling Efficient and Confident Annotation of LC–MS Metabolomics Data through MS1 Spectrum and  
604 Time Prediction. *Analytical Chemistry* **88**: 9226–9234.  
605 **de Bruijn WJC, van Dinteren S, Gruppen H, Vincken JP. 2019.** Mass spectrometric characterisation  
606 of avenanthramides and enhancing their production by germination of oat (*Avena sativa*). *Food Chemistry*  
607 **277**: 682–690.  
608 **Campbell MT, Hu H, Yeats TH, Caffè-Treml M, Gutiérrez L, Smith KP, Sorrells ME, Gore MA,**  
609 **Jannink J-L. 2021.** Translating insights from the seed metabolome into improved prediction for 10  
610 healthful compounds in oat (*Avena sativa* L.). *Genetics* **217**.  
611 **de los Campos G, Sorensen D, Gianola D. 2015.** Genomic Heritability: What Is It? (GS Barsh, Ed.).  
612 *PLOS Genetics* **11**: e1005048.  
613 **Carlson MO, Montilla-Bascon G, Hoekenga OA, Tinker NA, Poland J, Baseggio M, Sorrells ME,**  
614 **Jannink JL, Gore MA, Yeats TH. 2019.** Multivariate genome-wide association analyses reveal the  
615 genetic basis of seed fatty acid composition in oat (*Avena sativa* L.). *G3: Genes, Genomes, Genetics* **9**:  
616 2963–2975.  
617 **Chae L, Kim T, Nilo-Poyanco R, Rhee SY. 2014.** Genomic signatures of specialized metabolism in  
618 plants. *Science* **344**: 510–513.  
619 **Clohessy JW, Pauli D, Kreher KM, Buckler ES, Armstrong PR, Wu T, Hoekenga OA, Jannink J,**  
620 **Sorrells ME, Gore MA. 2018.** A Low-Cost Automated System for High-Throughput Phenotyping of  
621 Single Oat Seeds. *The Plant Phenome Journal* **1**: 1–13.  
622 **Collins FW. 2011.** Oat Phenolics: Biochemistry and Biological Functionality. In: Webster FH, Wood PJ,  
623 eds. *Oats: Chemistry and Technology*. St. Paul, MN: AACC International, 157–217.  
624 **Covarrubias-Pazarán G. 2016.** Genome-Assisted prediction of quantitative traits using the r package

- 625 sommer. *PLoS ONE* **11**: 1–15.
- 626 **Dimberg LH, Peterson DM. 2009.** Phenols in spikelets and leaves of field-grown oats (*Avena sativa*)  
627 with different inherent resistance to crown rust (*Puccinia coronata* f. sp. *avenae*). *Journal of the Science*  
628 *of Food and Agriculture* **89**: 1815–1824.
- 629 **Endelman JB. 2011.** Ridge Regression and Other Kernels for Genomic Selection with R Package  
630 rrBLUP. *The Plant Genome* **4**: 250–255.
- 631 **Fernandez A, Saez A, Quintero C, Gleiser G, Aizen MA. 2021.** Intentional and unintentional selection  
632 during plant domestication: herbivore damage, plant defensive traits and nutritional quality of fruit and  
633 seed crops. *New Phytologist* **231**: 1586–1598.
- 634 **Ferrero V, Baeten L, Blanco-Sánchez L, Planelló R, Díaz-Pendón JA, Rodríguez-Echeverría S,**  
635 **Haegeman A, Peña E. 2020.** Complex patterns in tolerance and resistance to pests and diseases underpin  
636 the domestication of tomato. *New Phytologist* **226**: 254–266.
- 637 **Friedman J, Hastie T, Tibshirani R. 2010.** Regularization Paths for Generalized Linear Models via  
638 Coordinate Descent. *Journal of Statistical Software* **33**: 1–22.
- 639 **Garrick DJ, Taylor JF, Fernando RL. 2009.** Deregressing estimated breeding values and weighting  
640 information for genomic regression analyses. *Genetics Selection Evolution* **41**: 1–8.
- 641 **González-Barrios P, Bhatta M, Halley M, Sandro P, Gutiérrez L. 2021.** Speed breeding and early  
642 panicle harvest accelerates oat (*Avena sativa* L.) breeding cycles. *Crop Science* **61**: 320–330.
- 643 **Günther-Jordanland K, Dawid C, Dietz M, Hofmann T. 2016.** Key Phytochemicals Contributing to  
644 the Bitter Off-Taste of Oat (*Avena sativa* L.). *Journal of Agricultural and Food Chemistry* **64**: 9639–  
645 9652.
- 646 **Günther-Jordanland K, Dawid C, Hofmann T. 2020.** Quantitation and Taste Contribution of Sensory  
647 Active Molecules in Oat (*Avena sativa* L.). *Journal of Agricultural and Food Chemistry* **68**: 10097–  
648 10108.
- 649 **Haikka H, Knürr T, Manninen O, Pietilä L, Isolahti M, Teperi E, Mäntysaari EA, Strandén I. 2020.**  
650 Genomic prediction of grain yield in commercial Finnish oat (*Avena sativa*) and barley (*Hordeum*  
651 *vulgare*) breeding programmes (H Buerstmayr, Ed.). *Plant Breeding* **139**: 550–561.
- 652 **Hu H, Campbell MT, Yeats TH, Zheng X, Runcie DE, Covarrubias-Pazarán G, Broeckling C, Yao**  
653 **L, Caffè-Treml M, Gutiérrez L, et al. 2021.** Multi-omics prediction of oat agronomic and seed  
654 nutritional traits across environments and in distantly related populations. *BioRxiv*.
- 655 **Hu H, Gutierrez-Gonzalez JJ, Liu X, Yeats TH, Garvin DF, Hoekenga OA, Sorrells ME, Gore MA,**  
656 **Jannink JL. 2020.** Heritable temporal gene expression patterns correlate with metabolomic seed content  
657 in developing hexaploid oat seed. *Plant Biotechnology Journal* **18**: 1211–1222.
- 658 **Huang J, Gu M, Lai Z, Fan B, Shi K, Zhou Y-H, Yu J-Q, Chen Z. 2010.** Functional Analysis of the  
659 Arabidopsis *PAL* Gene Family in Plant Growth, Development, and Response to Environmental Stress.  
660 *Plant Physiology* **153**: 1526–1538.
- 661 **Jacobowitz JR, Weng J-K. 2020.** Exploring Uncharted Territories of Plant Specialized Metabolism in  
662 the Postgenomic Era. *Annual Review of Plant Biology* **71**: 631–658.
- 663 **Kessler A, Kalske A. 2018.** Plant Secondary Metabolite Diversity and Species Interactions. *Annual*  
664 *Review of Ecology, Evolution, and Systematics* **49**: 115–138.
- 665 **Kim DS, Hwang BK. 2014.** An important role of the pepper phenylalanine ammonia-lyase gene (*PAL1*)  
666 in salicylic acid-dependent signalling of the defence response to microbial pathogens. *Journal of*  
667 *Experimental Botany* **65**: 2295–2306.
- 668 **Ku Y-S, Contador CA, Ng M-S, Yu J, Chung G, Lam H-M. 2020.** The Effects of Domestication on

- 669 Secondary Metabolite Composition in Legumes. *Frontiers in Genetics* **11**: 581357.
- 670 **Leveau A, Reed J, Qiao X, Stephenson MJ, Mugford ST, Melton RE, Rant JC, Vickerstaff R,**  
671 **Langdon T, Osbourn A. 2019.** Towards take-all control: a C-21 $\beta$  oxidase required for acylation of  
672 triterpene defence compounds in oat. *New Phytologist* **221**: 1544–1555.
- 673 **Li Z, Chen Y, Meesapyodsuk D, Qiu X. 2019.** The biosynthetic pathway of major avenanthramides in  
674 oat. *Metabolites* **9**: 163–163.
- 675 **Lin Y, Gnanesh BN, Chong J, Chen G, Beattie AD, Mitchell Fetch JW, Kutcher HR, Eckstein PE,**  
676 **Menzies JG, Jackson EW, et al. 2014.** A major quantitative trait locus conferring adult plant partial  
677 resistance to crown rust in oat. *BMC Plant Biology* **14**: 1–11.
- 678 **Lindig-Cisneros R, Dirzo R, Espinosa-García FJ. 2002.** Effects of domestication and agronomic  
679 selection on phytoalexin antifungal defense in *Phaseolus* beans: Phytoalexin defense in *Phaseolus* beans.  
680 *Ecological Research* **17**: 315–321.
- 681 **Loskutov IG. 2008.** On evolutionary pathways of *Avena* species. *Genetic Resources and Crop Evolution*  
682 **55**: 211–220.
- 683 **Love MI, Huber W, Anders S. 2014.** Moderated estimation of fold change and dispersion for RNA-seq  
684 data with DESeq2. *Genome biology* **15**: 550–550.
- 685 **Maeda HA. 2019.** Evolutionary diversification of primary metabolism and its contribution to plant  
686 chemical diversity. *Frontiers in Plant Science* **10**: 1–8.
- 687 **McNish IG, Zimmer CM, Susko AQ, Heuschele DJ, Tiede T, Case AJ, Smith KP. 2020.** Mapping  
688 crown rust resistance at multiple time points in elite oat germplasm. *Plant Genome* **13**: 1–15.
- 689 **Mithöfer A, Boland W. 2012.** Plant Defense Against Herbivores: Chemical Aspects. *Annual Review of*  
690 *Plant Biology* **63**: 431–450.
- 691 **Moghe G, Last RL. 2015.** Something old, something new: Conserved enzymes and the evolution of  
692 novelty in plant specialized metabolism. *Plant Physiology* **169**: 1512–1523.
- 693 **Murphy JP, Hoffman LA. 1992.** The Origin, History, and Production of Oat. In: Marshall HG, Sorrells  
694 ME, eds. Agronomy Monographs. Madison, WI, USA: American Society of Agronomy, Crop Science  
695 Society of America, 1–28.
- 696 **Mutwil M. 2020.** Computational approaches to unravel the pathways and evolution of specialized  
697 metabolism. *Current Opinion in Plant Biology* **55**: 38–46.
- 698 **Newell MA, Asoro FG, Scott MP, White PJ, Beavis WD, Jannink JL. 2012.** Genome-wide association  
699 study for oat (*Avena sativa* L.) beta-glucan concentration using germplasm of worldwide origin.  
700 *Theoretical and Applied Genetics* **125**: 1687–1696.
- 701 **Patro R, Duggal G, Love MI, Irizarry RA, Kingsford C. 2017.** Salmon provides fast and bias-aware  
702 quantification of transcript expression. *Nature Methods* **14**: 417–419.
- 703 **Peterson DM, Dimberg LH. 2008.** Avenanthramide concentrations and hydroxycinnamoyl-  
704 CoA:hydroxyanthranilate N-hydroxycinnamoyltransferase activities in developing oats. *Journal of Cereal*  
705 *Science* **47**: 101–108.
- 706 **Poelman EH, Galiart RJFH, Raaijmakers CE, Van Loon JJA, Van Dam NM. 2008.** Performance of  
707 specialist and generalist herbivores feeding on cabbage cultivars is not explained by glucosinolate  
708 profiles. *Entomologia Experimentalis et Applicata* **127**: 218–228.
- 709 **Ponchet M, Favre-Bonvin J, Hauteville M, Ricci P. 1988.** Dianthramides (N-Benzoyl and N-  
710 Paracoumarylanthranilic acid derivatives) from elicited tissues of *Dianthus caryophyllus*. *Phytochemistry*  
711 **27**: 725–730.
- 712 **Preece C, Livarda A, Christin P, Wallace M, Martin G, Charles M, Jones G, Rees M, Osborne CP.**

- 713 **2017**. How did the domestication of Fertile Crescent grain crops increase their yields? *Functional*  
714 *Ecology* **31**: 387–397.
- 715 **Rasmann S, Köllner TG, Degenhardt J, Hiltbold I, Toepfer S, Kuhlmann U, Gershenzon J,**  
716 **Turlings TCJ. 2005**. Recruitment of entomopathogenic nematodes by insect-damaged maize roots.  
717 *Nature* **434**: 732–737.
- 718 **Rodgers DM, Murphy JP, Frey KJ. 1983**. Impact of Plant Breeding on the Grain Yield and Genetic  
719 Diversity of Spring Oats. *Crop Science* **23**: 737–740.
- 720 **Rodriguez-Saona C, Vorsa N, Singh AP, Johnson-Cicalese J, Szendrei Z, Mescher MC, Frost CJ.**  
721 **2011**. Tracing the history of plant traits under domestication in cranberries: Potential consequences on  
722 anti-herbivore defences. *Journal of Experimental Botany* **62**: 2633–2644.
- 723 **Rosenthal JP, Dirzo R. 1997**. Effects of life history, domestication and agronomic selection on plant  
724 defence against insects: Evidence from maizes and wild relatives. *Evolutionary Ecology* **11**: 337–355.
- 725 **Rossum B-J van, Kruijer W. 2020**. Package ‘statgenGWAS’. CRAN.
- 726 **Sang S, Chu YF. 2017**. Whole grain oats, more than just a fiber: Role of unique phytochemicals.  
727 *Molecular Nutrition and Food Research* **61**: 1–12.
- 728 **Shabalin AA. 2012**. Matrix eQTL: Ultra fast eQTL analysis via large matrix operations. *Bioinformatics*  
729 **28**: 1353–1358.
- 730 **Shang Y, Ma Y, Zhou Y, Zhang H, Duan L, Chen H, Zeng J. 2014**. Biosynthesis, regulation and  
731 domestication of bitterness in cucumber. *Science (New York, N.Y.)* **346**: 1084–1088.
- 732 **Singh R, De S, Belkheir A. 2013**. *Avena sativa* (Oat), A Potential Nutraceutical and Therapeutic Agent:  
733 An Overview. *Critical Reviews in Food Science and Nutrition* **53**: 126–144.
- 734 **Soltis NE, Kliebenstein DJ. 2015**. Natural variation of plant metabolism: Genetic mechanisms,  
735 interpretive caveats, and evolutionary and mechanistic insights. *Plant Physiology* **169**: 1456–1468.
- 736 **Sorokina M, Merseburger P, Rajan K, Aziz Yurik M, Steinbeck C. 2021**. COCONUT online:  
737 Collection of Open Natural Products database. *Journal of Cheminformatics* **13**: 2.
- 738 **Stewart C, Kang BC, Liu K, Mazourek M, Moore SL, Eun YY, Kim BD, Paran I, Jahn MM. 2005**.  
739 The Pun1 gene for pungency in pepper encodes a putative acyltransferase. *Plant Journal* **42**: 675–688.
- 740 **Stewart D, McDougall G. 2014**. Oat agriculture, cultivation and breeding targets: Implications for  
741 human nutrition and health. *British Journal of Nutrition* **112**: S50–S57.
- 742 **Tsugawa H, Kind T, Nakabayashi R, Yukihiro D, Tanaka W, Cajka T, Saito K, Fiehn O, Arita M.**  
743 **2016**. Hydrogen Rearrangement Rules: Computational MS/MS Fragmentation and Structure Elucidation  
744 Using MS-FINDER Software. *Analytical Chemistry* **88**: 7946–7958.
- 745 **Turcotte MM, Turley NE, Johnson MTJ. 2014**. The impact of domestication on resistance to two  
746 generalist herbivores across 29 independent domestication events. *New Phytologist* **204**: 671–681.
- 747 **Wager A, Li X. 2018**. Exploiting natural variation for accelerating discoveries in plant specialized  
748 metabolism. *Phytochemistry Reviews* **17**: 17–36.
- 749 **Whitehead SR, Poveda K. 2019**. Resource allocation trade-offs and the loss of chemical defences during  
750 apple domestication. *Annals of Botany* **123**: 1029–1041.
- 751 **Whitehead SR, Turcotte MM, Poveda K. 2017**. Domestication impacts on plant–herbivore interactions:  
752 a meta-analysis. *Philosophical Transactions of the Royal Society B: Biological Sciences* **372**: 20160034–  
753 20160034.
- 754 **Wise ML. 2011**. Effect of chemical systemic acquired resistance elicitors on avenanthramide biosynthesis  
755 in oat (*Avena sativa*). *Journal of Agricultural and Food Chemistry* **59**: 7028–7038.
- 756 **Wise ML. 2014**. Avenanthramides: Chemistry and Biosynthesis. In: Chu Y-F, ed. Oats Nutrition and



757 Technology. Oxford, UK: John Wiley & Sons.  
758 **Wise ML. 2017.** Tissue distribution of avenanthramides and gene expression of hydroxycinnamoyl-  
759 CoA:Hydroxyanthranilate N-hydroxycinnamoyl transferase (HHT) in benzothiadiazole-treated oat (*Avena*  
760 *sativa*). *Canadian Journal of Plant Science* **98**: 444–456.  
761 **Wise ML, Doehlert DC, McMullen MS. 2008.** Association of avenanthramide concentration in oat  
762 (*Avena sativa* L.) grain with crown rust incidence and genetic resistance. *Cereal Chemistry* **85**: 639–641.  
763 **Wise ML, Vinje MA, Conley SP. 2016.** Field application of benzothiadiazole (BTH) to oats (*Avena*  
764 *sativa*): Effects on crown rust resistance and avenanthramide production. *Crop Science* **56**: 1904–1913.  
765 **Zhao J, Kebede AZ, Menzies JG, Paczos-Grzęda E, Chong J, Mitchell Fetch JW, Beattie AD, Peng**  
766 **YY, McCartney CA. 2020.** Chromosomal location of the crown rust resistance gene Pc98 in cultivated  
767 oat (*Avena sativa* L.). *Theoretical and Applied Genetics* **133**: 1109–1122.  
768 **Zhou S, Kremling KA, Bandillo N, Richter A, Zhang YK, Ahern KR, Artyukhin AB, Hui JX,**  
769 **Younkin GC, Schroeder FC, et al. 2019.** Metabolome-scale genome-wide association studies reveal  
770 chemical diversity and genetic control of maize specialized metabolites. *Plant Cell* **31**: 937–955.  
771 **Zhu G, Wang S, Huang Z, Zhang S, Liao Q, Zhang C, Lin T, Qin M, Peng M, Yang C, et al. 2018.**  
772 Rewiring of the Fruit Metabolome in Tomato Breeding. *Cell* **172**: 249-261.e12.  
773

## Tables and Figures

775 **Figure 1.** Phenotypic and genetic correlation of specialized metabolites in oat seed  
 776 (avenanthramides, “AVN”; avenacins, “AEC”; avenacosides, “AOS”) in the (a) diverse panel  
 777 evaluated only in New York, and elite panel evaluated in (b) Minnesota (“MN”), (c) South  
 778 Dakota (“SD”), (d) Wisconsin (“WI”), USA. The specific type of metabolite is described in  
 779 **Table S1.** The values in the top diagonal are Pearson’s phenotypic correlations, where bold  
 780 indicates significance at the Bonferroni cutoff ( $p < 0.001$ ), the values in the bottom diagonal are  
 781 genetic correlations with no associated statistical values, and  $h^2$  is the genomic heritability.

782

a. Diversity panel

|          | $h^2$ | AVN_A       | AVN_B       | AEC_A1.1    | AEC_A1.2    | AOS_A       | AOS_dA       | AOS_B        |
|----------|-------|-------------|-------------|-------------|-------------|-------------|--------------|--------------|
| AVN_A    | 0.26  |             | <b>0.85</b> | -0.04       | 0.00        | -0.16       | <b>-0.21</b> | <b>-0.18</b> |
| AVN_B    | 0.26  | <b>0.87</b> |             | 0.02        | 0.07        | -0.17       | <b>-0.20</b> | -0.17        |
| AEC_A1.1 | 0.52  | -0.12       | -0.14       |             | <b>0.96</b> | <b>0.28</b> | <b>0.38</b>  | <b>0.30</b>  |
| AEC_A1.2 | 0.41  | -0.14       | -0.10       | <b>0.99</b> |             | <b>0.28</b> | <b>0.36</b>  | <b>0.27</b>  |
| AOS_A    | 0.52  | -0.48       | -0.38       | 0.37        | 0.46        |             | <b>0.71</b>  | <b>0.25</b>  |
| AOS_dA   | 0.45  | -0.56       | -0.39       | 0.66        | 0.74        | 0.69        |              | <b>0.38</b>  |
| AOS_B    | 0.42  | -0.47       | -0.24       | 0.31        | 0.34        | 0.11        | 0.59         |              |

b. Elite panel, MN

|          | $h^2$ | AVN_A       | AVN_B       | AEC_A1.1    | AEC_A1.2    | AOS_A | AOS_dA      | AOS_B |
|----------|-------|-------------|-------------|-------------|-------------|-------|-------------|-------|
| AVN_A    | 0.06  |             | <b>0.90</b> | 0.05        | -0.08       | 0.09  | 0.11        | 0.13  |
| AVN_B    | 0.09  | <b>0.89</b> |             | 0.05        | -0.09       | 0.00  | -0.05       | -0.02 |
| AEC_A1.1 | 0.46  | -0.07       | -0.22       |             | <b>0.91</b> | -0.01 | 0.12        | 0.19  |
| AEC_A1.2 | 0.34  | 0.06        | -0.11       | <b>0.99</b> |             | 0.02  | 0.11        | 0.17  |
| AOS_A    | 0.50  | 0.53        | 0.49        | -0.41       | -0.40       |       | <b>0.52</b> | 0.19  |
| AOS_dA   | 0.26  | 0.01        | 0.03        | -0.10       | -0.14       | 0.62  |             | -0.09 |
| AOS_B    | 0.03  | NA          | NA          | NA          | NA          | NA    | NA          |       |

c. Elite panel, SD

|          | $h^2$ | AVN_A       | AVN_B       | AEC_A1.1 | AEC_A1.2    | AOS_A       | AOS_dA      | AOS_B       |
|----------|-------|-------------|-------------|----------|-------------|-------------|-------------|-------------|
| AVN_A    | 0.19  |             | <b>0.90</b> | -0.07    | -0.10       | -0.02       | -0.03       | 0.00        |
| AVN_B    | 0.25  | <b>0.92</b> |             | -0.11    | -0.09       | -0.01       | -0.07       | -0.04       |
| AEC_A1.1 | 0.20  | 0.15        | -0.01       |          | <b>0.59</b> | <b>0.32</b> | <b>0.40</b> | <b>0.24</b> |
| AEC_A1.2 | 0.12  | -0.12       | -0.41       | 0.67     |             | 0.21        | <b>0.28</b> | <b>0.23</b> |
| AOS_A    | 0.16  | -0.04       | 0.00        | -0.02    | -0.31       |             | <b>0.56</b> | 0.15        |
| AOS_dA   | 0.06  | NA          | NA          | NA       | NA          | NA          |             | 0.01        |
| AOS_B    | 0.01  | NA          | NA          | NA       | NA          | NA          | NA          |             |

d. Elite panel, WI

|          | $h^2$ | AVN_A       | AVN_B       | AEC_A1.1    | AEC_A1.2    | AOS_A | AOS_dA | AOS_B |
|----------|-------|-------------|-------------|-------------|-------------|-------|--------|-------|
| AVN_A    | 0.11  |             | <b>0.92</b> | <b>0.26</b> | 0.19        | NA    | NA     | NA    |
| AVN_B    | 0.15  | <b>0.87</b> |             | 0.17        | 0.13        | NA    | NA     | NA    |
| AEC_A1.1 | 0.58  | 0.31        | 0.14        |             | <b>0.84</b> | NA    | NA     | NA    |
| AEC_A1.2 | 0.33  | 0.34        | 0.22        | <b>0.98</b> |             | NA    | NA     | NA    |
| AOS_A    | NA    | NA          | NA          | NA          | NA          |       | NA     | NA    |
| AOS_dA   | NA    | NA          | NA          | NA          | NA          | NA    |        | NA    |
| AOS_B    | NA    | NA          | NA          | NA          | NA          | NA    | NA     |       |

783

784

785 **Figure 2.** Relationship between specialized metabolites and seed size in the diversity panel  
786 (evaluated only in New York) and elite panel evaluated in Minnesota (“MN”) and Wisconsin  
787 (“WI”); data not available for the elite panel evaluated in South Dakota. For each metabolite  
788 class, an example was chosen where ‘Avenanthramide’ refers to avenanthramide B, ‘Avenacin’  
789 refers to avenacin A1.1, and ‘Avenacoside’ refers to avenacoside A (**Table S1**). Model results  
790 for all metabolites are in presented **Table S7**. The \*\*\* indicates  $p < 1e-6$ , \*\*  $p < 1e-3$ , and ‘ns’  
791 indicates  $p > 0.05$ .

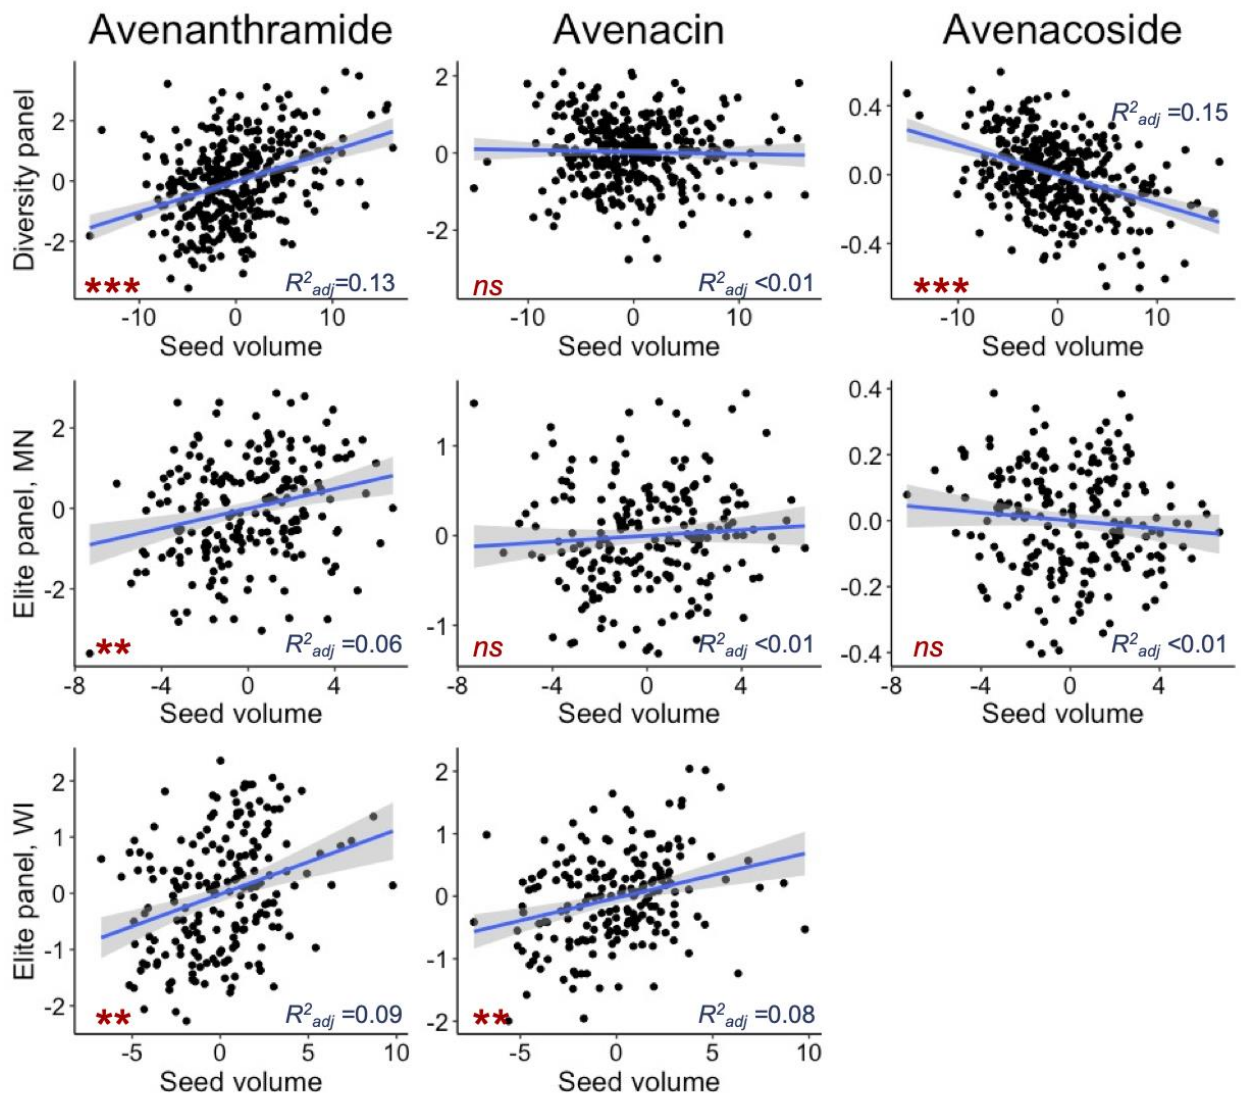

792  
793

794 **Figure 3.** Relationship between year of variety release and deregressed BLUPs of (a) seed  
795 volume, (b) seed surface area, (c) seed surface area to volume ratio, (d) hundred kernel weight,  
796 (e) hundred hull weight, (f) groat percent, (g) avenanthramide, (h) an avenacin, and (i) an  
797 avenacoside in the diversity panel. For each metabolite class, an example was chosen where  
798 ‘Avenanthramide’ refers to avenanthramide B, ‘Avenacin’ refers to avenacin A1.1, and  
799 ‘Avenacoside’ refers to avenacoside A (**Table S1**). Model results for all traits are in presented  
800 **Table S10**. The \*\*\* indicates  $p < 1e-6$ , \*\*  $p < 1e-3$ , \*  $p < 0.05$ , and ‘ns’ indicates  $p > 0.05$ .

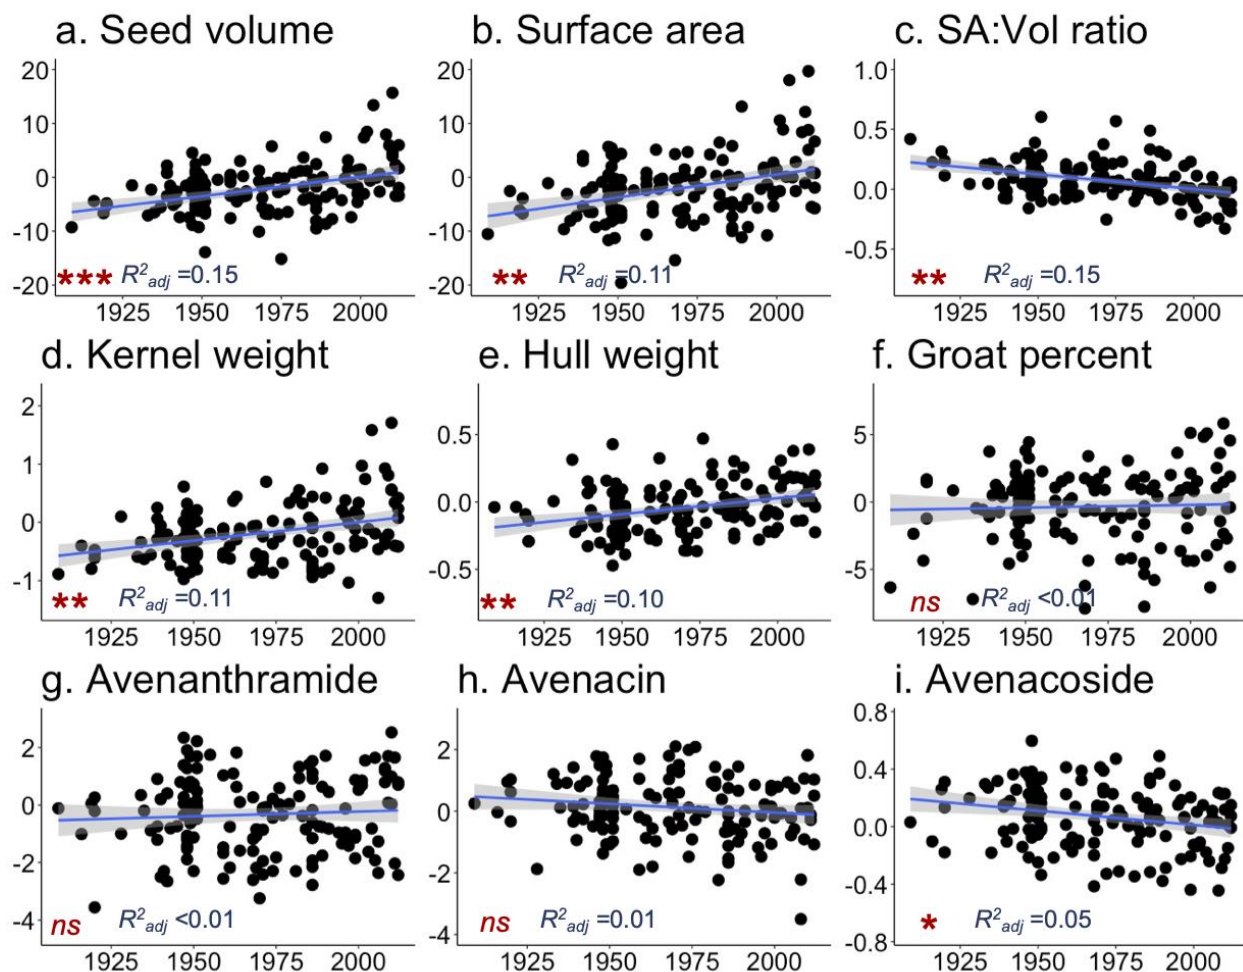

801  
802

803 **Figure 4.** Number of SNPs from within 10Mb bins meeting a  $pFDR < 0.20$  significance threshold  
804 from GWAS analysis by germplasm panel and environment. The panels show specific trait types  
805 (avenanthramides, avenacins, avenacosides and seed traits) where color indicates environment  
806 and specific trait.

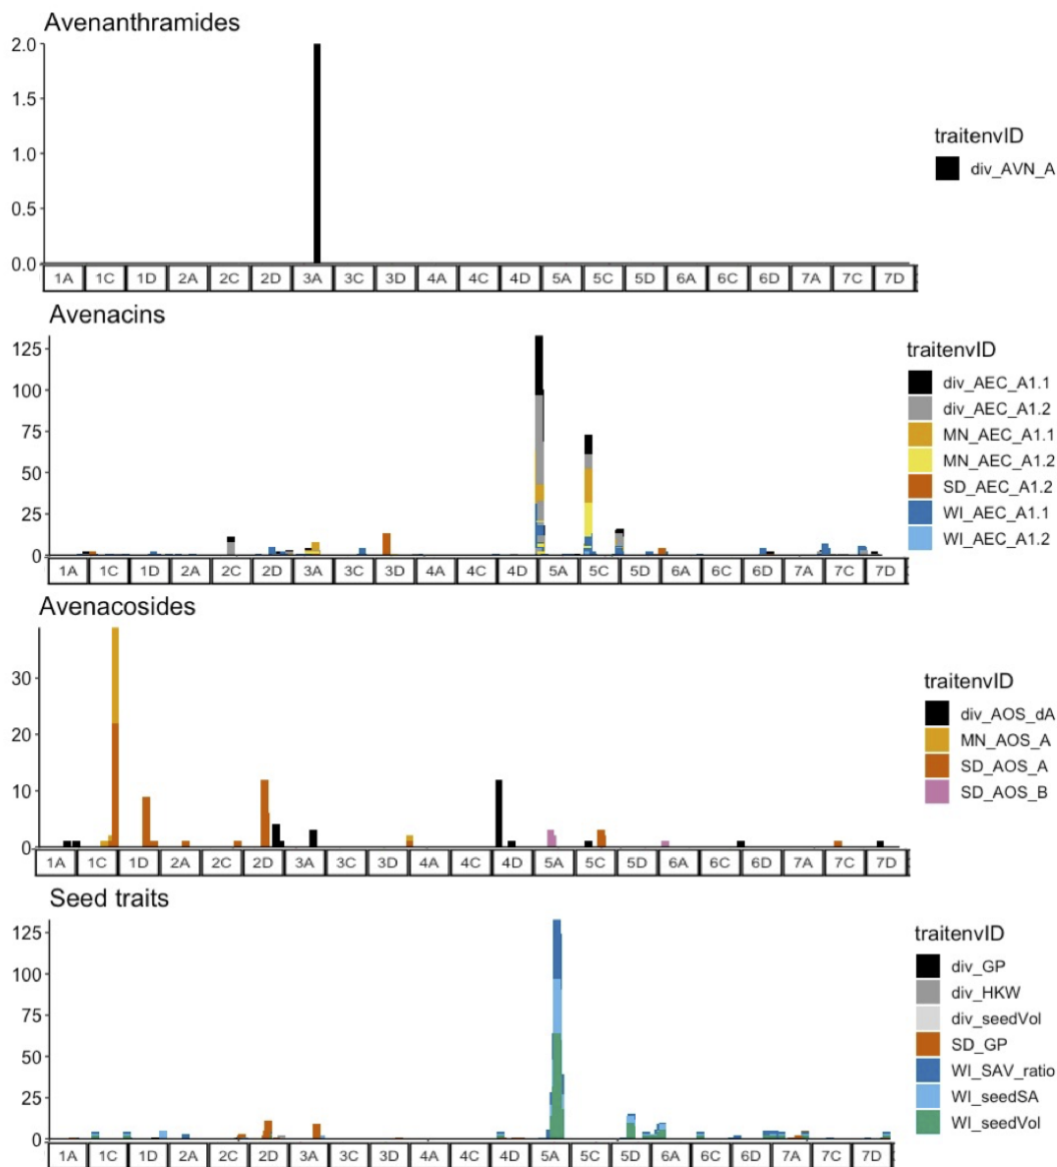

807  
808

809 **Figure 5.** Oat seed transcripts classified by temporal variant category and direction as described  
810 in (Hu *et al.*, 2020). The percent of transcripts in each category is shown for all transcripts in the  
811 dataset (“all”), transcripts annotated to be part of the preceding shikimate pathway  
812 (“Shik\_Pwy”), transcripts annotated in avenanthramide biosynthesis (“Avn\_Pwy”), and each of  
813 the avenanthramides (A, B and C). The numbers at the top indicate the number of transcripts that  
814 were annotated by temporal group.

815

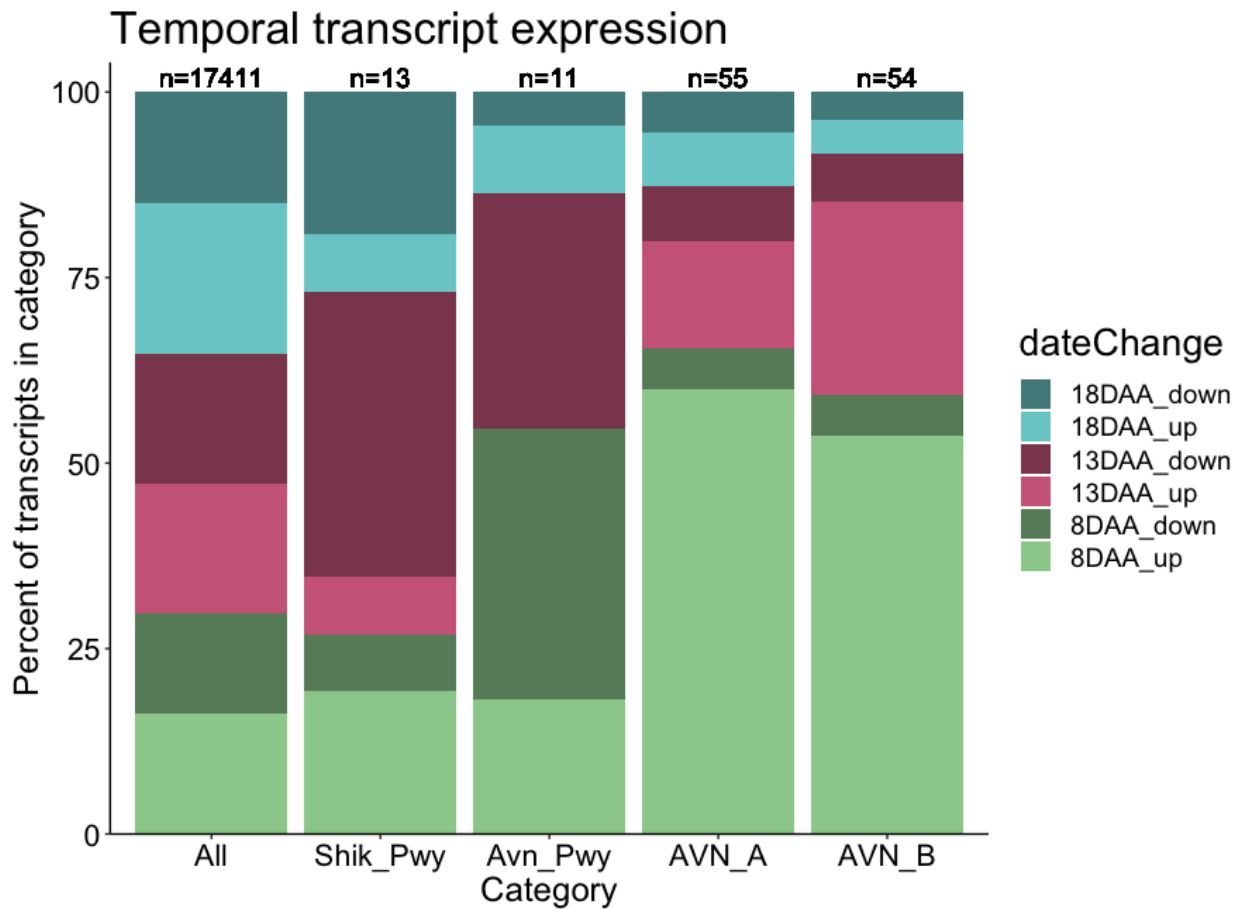

816  
817

818 **Figure 6.** The relationship and coefficient of determination between expression of (a)  
819 phenylalanine ammonia-lyase, “PAL” and (c) phosphoenolpyruvate/phosphate translocator 1,  
820 “PEPT” and avenanthramide B (“Avn\_B”) concentration and the relationship between seed  
821 volume and (b) PAL and (d) PEPT expression. The relationship between avenanthramide B and  
822 all TWAS results are given in **Table S16**.  
823

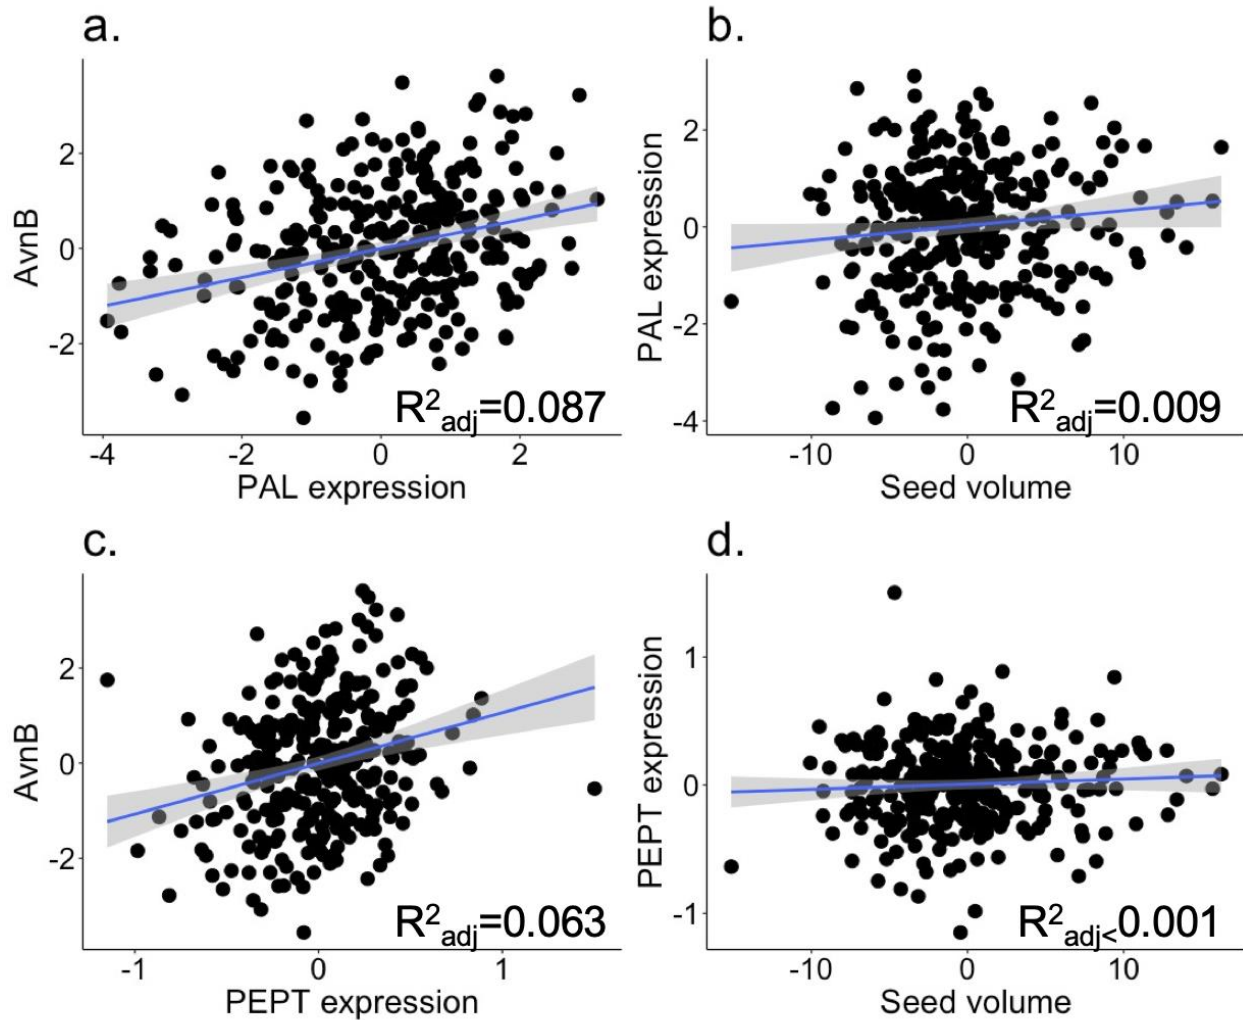

824  
825



826 **Table 1.** Significant SNPs from GWAS of metabolites and seed traits by panel and environment.  
 827 The diversity panel was evaluated in only one environment (NY, USA). The *P*-value is adjusted  
 828 with a Bonferroni correction.

829

| Trait <sup>1</sup> , panel, environment | SNP                      | Chr, Position | <i>p</i> -value | Effect |
|-----------------------------------------|--------------------------|---------------|-----------------|--------|
| AVN_A, diversity, NY                    | avgbs_cluster_30159.1.28 | 3A, 406909563 | 0.035           | 0.34   |
| AEC_A1.1, diversity, NY                 | avgbs_32431.1.14         | 5A, 456500997 | 0.031           | -0.36  |
| AEC_A1.2, elite, SD                     | avgbs_cluster_3322.1.38  | 6C, 2212093   | 0.005           | -0.20  |
| AEC_A1.1, elite, WI                     | avgbs_21467.1.45         | 5D, 387376916 | 0.033           | 0.29   |
| AOS_dA, diversity, NY                   | avgbs_1891.1.28          | 4D, 266095186 | 0.038           | -0.25  |
| HKW, diversity, NY                      | avgbs_cluster_39333.1.13 | 2D, 518487763 | 0.002           | -0.41  |
| GP, elite, SD                           | avgbs_cluster_42433.1.28 | 3C, 3654644   | 0.007           | -3.24  |
| GP, elite, SD                           | avgbs_96083.1.13         | 3C, 3657557   | 0.015           | 3.36   |
| GP, elite, SD                           | avgbs_221727.1.25        | 3C, 6201470   | 0.008           | 3.23   |
| GP, elite, SD                           | avgbs_cluster_11404.1.64 | 3C, 7293210   | 0.013           | -3.18  |
| GP, elite SD                            | avgbs_cluster_11404.1.57 | 3C, 7293217   | 0.015           | -2.99  |

830

831 <sup>1</sup>Trait names are defined as follows: avenanthramide A , “AVN\_A”; avenanthramide B ,  
 832 “AVN\_B”; avenacin A1, “AEC\_A1.1” and “AEC\_A1.2”; avenacoside A, “AOS\_A”; 26-  
 833 Desglucoavenacoside A, “AOS\_dA”; avenacoside B, “AOS\_B”

834 **Table 2.** Significant transcripts ( $p_{FDR} < 0.05$ ) from TWAS of avenanthramides that have gene annotations. A full list of all significant  
835 transcripts is in **Table S13**. Rank refers to overall transcript significance in TWAS analysis, and effect refers to the direction of  
836 correlation between expression and relative concentration of avenanthramide.

837

| Transcript id             |    | AVN_A rank | AVN_A $p_{FDR}$ | AVN_B rank | AVN_B $p_{FDR}$ | Effect   | Annotation                                                           |
|---------------------------|----|------------|-----------------|------------|-----------------|----------|----------------------------------------------------------------------|
| TRINITY_DN1008_c0_g2_i2   | AB | 15         | 0.002           | 19         | 0.004           | positive | Serine hydroxymethyltransferase 4                                    |
| TRINITY_DN15878_c0_g1_i6  | AB | 17         | 0.002           | 34         | 0.008           | positive | Germacrene A hydroxylase                                             |
| TRINITY_DN14541_c0_g1_i1  | AB | 18         | 0.002           | 31         | 0.008           | positive | Berberine bridge enzyme-like 18                                      |
| TRINITY_DN26560_c0_g2_i1  | AB | 21         | 0.003           | 21         | 0.005           | positive | Phenylalanine ammonia-lyase                                          |
| TRINITY_DN1103_c0_g1_i1   | AB | 22         | 0.003           | 32         | 0.008           | positive | Succinate-semialdehyde dehydrogenase, mitochondrial                  |
| TRINITY_DN2744_c0_g1_i4   | AB | 23         | 0.004           | 53         | 0.020           | positive | Fructose-bisphosphate aldolase 3, chloroplastic                      |
| TRINITY_DN29096_c0_g1_i9  | AB | 26         | 0.006           | 26         | 0.006           | positive | Probable purine permease 11                                          |
| TRINITY_DN2577_c0_g1_i1   | AB | 31         | 0.008           | 33         | 0.008           | positive | Putative 12-oxophytodienoate reductase 11                            |
| TRINITY_DN3411_c0_g1_i4   | AB | 38         | 0.015           | 57         | 0.024           | positive | Transketolase, chloroplastic                                         |
| TRINITY_DN16295_c0_g1_i1  | AB | 41         | 0.015           | 30         | 0.007           | positive | Mixed-linked glucan synthase 2                                       |
| TRINITY_DN3916_c0_g1_i1   | AB | 47         | 0.023           | 36         | 0.010           | positive | ALA-interacting subunit 1                                            |
| TRINITY_DN1581_c0_g1_i3   | AB | 48         | 0.023           | 22         | 0.005           | positive | Phosphoenolpyruvate/phosphate translocator 1, chloroplastic          |
| TRINITY_DN784_c0_g1_i3    | AB | 55         | 0.027           | 13         | 0.002           | positive | Probable methylenetetrahydrofolate reductase                         |
| TRINITY_DN2924_c0_g1_i2   | AB | 66         | 0.039           | 15         | 0.004           | positive | Glucose-6-phosphate 1-dehydrogenase, cytoplasmic isoform             |
| TRINITY_DN13684_c0_g1_i1  | AB | 70         | 0.047           | 56         | 0.023           | positive | Aconitate hydratase 3, mitochondrial                                 |
| TRINITY_DN512_c0_g2_i1    | A  | 30         | 0.008           | 160        | 0.171           | positive | Phosphoenolpyruvate carboxylase 2                                    |
| TRINITY_DN13998_c0_g1_i1  | A  | 39         | 0.015           | 122        | 0.123           | positive | Xylanase inhibitor protein 1                                         |
| TRINITY_DN1272_c0_g1_i3   | A  | 45         | 0.021           | 217        | 0.218           | positive | Sucrose transport protein SUT1; N                                    |
| TRINITY_DN3267_c0_g1_i1   | A  | 53         | 0.027           | NS         | NS              | negative | Pentatricopeptide repeat-containing protein At2g15690, mitochondrial |
| TRINITY_DN14356_c1_g1_i10 | A  | 54         | 0.027           | 151        | 0.169           | positive | Isoflavone 2'-hydroxylase                                            |
| TRINITY_DN11233_c0_g1_i7  | A  | 58         | 0.030           | 260        | 0.231           | positive | Cytochrome P450 81D11                                                |
| TRINITY_DN20857_c0_g1_i4  | A  | 62         | 0.035           | 99         | 0.090           | positive | S-adenosylmethionine decarboxylase proenzyme                         |
| TRINITY_DN9961_c0_g1_i7   | A  | 71         | 0.047           | 74         | 0.053           | positive | Endo-1,4-beta-xylanase5                                              |
| TRINITY_DN7337_c0_g3_i1   | A  | 72         | 0.050           | 172        | 0.180           | positive | Probable metal-nicotianamine transporter YSL12                       |
| TRINITY_DN19061_c0_g1_i1  | B  | 86         | 0.073           | 38         | 0.010           | positive | aldehyde dehydrogenase family 2 member C4                            |

|                          |   |     |       |    |       |          |                                                      |
|--------------------------|---|-----|-------|----|-------|----------|------------------------------------------------------|
| TRINITY_DN2385_c0_g1_i1  | B | 115 | 0.103 | 61 | 0.031 | positive | Transketolase,chloroplastic                          |
| TRINITY_DN2667_c0_g1_i1  | B | 155 | 0.150 | 66 | 0.041 | positive | Probable nitronate monooxygenase                     |
| TRINITY_DN1363_c0_g1_i2  | B | 163 | 0.169 | 67 | 0.044 | negative | Serine/threonine-protein kinase rio2                 |
| TRINITY_DN4266_c0_g1_i6  | B | 211 | 0.233 | 43 | 0.013 | positive | Probable inositol oxygenase                          |
| TRINITY_DN28530_c0_g1_i4 | B | NS  | NS    | 35 | 0.008 | positive | Threonine synthase 1, chloroplastic                  |
| TRINITY_DN2212_c0_g1_i2  | B | NS  | NS    | 68 | 0.044 | negative | Eukaryotic translation initiation factor 2 subunit 3 |

838

839

840 **Table 3.** Significant transcripts ( $p_{FDR} < 0.05$ ) from TWAS of avenacins (AEC) and avenacosides (AOS) where rank refers to overall  
841 transcript significance in TWAS analysis, and effect refers to the direction of correlation between expression and relative metabolite  
842 concentration. Annotations are provided when available.

843

| Transcript name          | AEC_A1.1 |           | AEC_A1.2 |           | AOS_B |           | Direction | Annotation                                    |
|--------------------------|----------|-----------|----------|-----------|-------|-----------|-----------|-----------------------------------------------|
|                          | rank     | $p_{FDR}$ | rank     | $p_{FDR}$ | rank  | $p_{FDR}$ |           |                                               |
| TRINITY_DN36363_c0_g2_i1 | 1        | 4.1E-05   | 1        | 8.E-05    | -     | -         | positive  |                                               |
| TRINITY_DN6771_c0_g1_i1  | 2        | 2.4E-04   | 2        | 0.006     | -     | -         | positive  | Phosphoethanolamine N-<br>methyltransferase 1 |
| TRINITY_DN97809_c0_g1_i1 | 3        | 0.03      | 4        | 0.04      | -     | -         | positive  |                                               |
| TRINITY_DN7675_c0_g1_i7  | 5        | 0.09      | 3        | 0.02      | -     | -         | positive  |                                               |
| TRINITY_DN1526_c0_g1_i12 | -        | -         | -        | -         | 1     | 0.050     | negative  |                                               |

844

845 **Table 4.** GO enrichment of biological process terms for avenanthramide TWAS results where the top three GO terms from each  
 846 avenanthramide (AVN) are presented along with the rank for the other avenanthramides. The p-values are unadjusted and the \*  
 847 indicates that it is significant when adjusted for a false discovery rate.

848

| GO ID      | Term                              | AVN_A |          | AVN_B |          |
|------------|-----------------------------------|-------|----------|-------|----------|
|            |                                   | rank  | <i>p</i> | rank  | <i>p</i> |
| GO:0006098 | pentose-phosphate shunt           | 1     | 6.1E-05  | 1     | 7.7E-06* |
| GO:0006559 | L-phenylalanine catabolic process | 2     | 2.8E-04  | -     | -        |
| GO:0009423 | chorismate biosynthetic process   | 3     | 7.1E-04  | 2     | 1.7E-03  |
| GO:0090630 | activation of GTPase activity     | -     | -        | 3     | 2.5E-03  |

849

850 **Supporting information contents**

- 851
- 852 **Figure S1.** Scree plots for genomic principal component analysis
- 853 **Figure S2.** Scree plots for PEER analysis of gene expression data
- 854 **Figure S3.** Genome-wide association study results for all metabolites, and germplasm panels  
855 with significant results
- 856 **Figure S4.** eQTL analysis results from genes implicated in avenanthramide TWAS analysis and  
857 known biosynthetic genes
- 858 **Table S1.** Metabolite spectra and names in both germplasm panels
- 859 **Table S2.** ANOVA results for days to heading (DTH) covariate significance in drBLUP  
860 calculation for metabolite and seed size phenotypes
- 861 **Table S3.** Year of variety release from all available oat lines in diversity panel
- 862 **Table S4.** Crown rust QTL SNPs mapped to most recent genome
- 863 **Table S5.** Transcripts associated with avenanthramide biosynthetic pathway
- 864 **Table S6.** Seed size heritability
- 865 **Table S7.** Relationship between seed size and relative metabolite concentration ANOVA results
- 866 **Table S8.** Relationship between seed weight and metabolite relative metabolite concentration  
867 ANOVA results
- 868 **Table S9.** Genetic correlation between seed size and specialized metabolites
- 869 **Table S10.** Relationships between variety release year and seed size and metabolite relative  
870 metabolite concentration ANOVA results.
- 871 **Table S11.** Results from multiple regression analysis using variety release year and seed size.
- 872 **Table S12.** All genes within 100kB of significant GWAS results
- 873 **Table S13.** Full avenanthramide transcriptome-wide association study (TWAS) results
- 874 **Table S14.** GO enrichment of biological process terms from avenacin TWAS results
- 875 **Table S15.** GO enrichment of biological process terms from avenacoside TWAS results
- 876 **Table S16.** ANOVA results for relationship between gene expression and seed volume
- 877 **Method S1.** Metabolite extraction, measurement and annotation
